# Supplementary material for: Validity of diagnoses of SARS-CoV-2 infection in Canadian administrative health data: a multiprovince, population-based cohort study
Source: PubMed Central journal article supplement — CMAJ Open. 2023 Sep 5;11(5):E790–8. doi: 10.9778/cmajo.20220152 (PMC10482491; doi:10.9778/cmajo.20220152), 2023-09-05
Supplement: open-2022-0152-1-at.pdf [file open-2022-0152-1-at.pdf]

## Supplementary Material

**Table S1. Study data sources by site**

| Site                    | Data Source                                                  |                                                              |                                                                            |                                |                                                                             |
|-------------------------|--------------------------------------------------------------|--------------------------------------------------------------|----------------------------------------------------------------------------|--------------------------------|-----------------------------------------------------------------------------|
|                         | Health insurance registry data                               | Physician service claims data                                | Emergency department data                                                  | Inpatient hospitalization data | PCR test data                                                               |
| <b>British Columbia</b> | Medical Services Plan & Premium Billing (Consolidation file) | Medical Services Plan                                        | CIHI NACRS                                                                 | CIHI DAD                       | BC Ministry of Health COVID-19 Test Laboratory Data                         |
| <b>Manitoba</b>         | Manitoba Health Insurance Registry                           | Manitoba Health Medical-Physician Services                   | Winnipeg Regional Health Authority Emergency Department Information System | CIHI DAD                       | Manitoba Cadham Provincial COVID-19 Laboratory Testing and Results Database |
| <b>Ontario</b>          | Ontario Health Insurance Plan Registered Persons Database    | Ontario Health Insurance Plan (OHIP) Claims History Database | CIHI NACRS                                                                 | CIHI DAD                       | Ontario Laboratories Information System                                     |

**Abbreviations:** CIHI: Canadian Institute for Health Information; NACRS: National Ambulatory Care Reporting System; DAD: Discharge Abstract Database

**Note:** CIHI DAD and NACRS data are coded by trained abstractors using national coding standards and procedures (please see Canadian Institute for Health Information. Canadian Coding Standards for Version 2022 ICD-10-CA and CCI. Ottawa, ON: CIHI; 2022, available at [www.cihi.ca](http://www.cihi.ca)). Physician billing records are not necessarily coded by trained abstractors and any coding directions and data quality assessments are provincial in scope.

**Table S2: International Classification of Diseases (ICD) and service codes to ascertain COVID-19 cases in administrative data**

| Code   | Descriptor                                                                                        | Source of Code                                                    | Purpose                                                           |
|--------|---------------------------------------------------------------------------------------------------|-------------------------------------------------------------------|-------------------------------------------------------------------|
| U07.1  | Diagnosis code: COVID-19, virus identified                                                        | CIHI, ICD-10-CA                                                   | Identify COVID-19 cases in inpatient and ED cohorts               |
| C19    | Diagnosis code: Services directly related to COVID-19                                             | British Columbia Medical Services Plan (effective March 13, 2020) | Identify COVID-19 cases in outpatient cohort for British Columbia |
| 13701  | Service code: Office visit for COVID-19 with test                                                 | British Columbia Medical Services Plan (effective March 13, 2020) | Identify COVID-19 cases in outpatient cohort for British Columbia |
| 13702  | Service code: Office visit for COVID-19 without test                                              | British Columbia Medical Services Plan (effective March 13, 2020) | Identify COVID-19 cases in outpatient cohort for British Columbia |
| 13708  | Service code: Family physician COVID-19 communication with specialist and/or allied care provider | British Columbia Medical Services Plan (effective March 13, 2020) | Identify COVID-19 cases in outpatient cohort for British Columbia |
| 10008  | Service code: Urgent specialist COVID-19 advice                                                   | British Columbia Medical Services Plan (effective March 13, 2020) | Identify COVID-19 cases in outpatient cohort for British Columbia |
| 079.82 | Diagnosis code: COVID-19 associated coronavirus                                                   | Manitoba Health (effective March 30, 2020)                        | Identify COVID-19 cases in outpatient cohort for Manitoba         |
| 080    | Diagnosis code: Coronavirus                                                                       | Ontario Health Insurance Plan (effective March 14, 2020)          | Identify COVID-19 cases in outpatient cohort for Ontario          |

**Abbreviations:** CIHI: Canadian Institute for Health Information; ED: Emergency Department and ICD-10-CA: International Classification of Diseases, 10th revision, Canadian enhancement

**Table S3. Characteristics of inpatient cohort by province**

| <b>Characteristic</b>           | <b>British Columbia</b> | <b>Manitoba</b> | <b>Ontario</b> |
|---------------------------------|-------------------------|-----------------|----------------|
| <b>Patients, N</b>              | 563,271                 | 72,143          | 665,755        |
| <b>Age, years</b>               |                         |                 |                |
| Mean (SD)                       | 56.7 (20.7)             | 52.2 (23.8)     | 55.6 (23.4)    |
| <65, n (%)                      | 325,157 (57.7)          | 45,422 (63.0)   | 382,322 (57.4) |
| 65-79, n (%)                    | 169,678 (30.1)          | 15,918 (22.1)   | 167,007 (25.1) |
| 80+, n (%)                      | 68,436 (12.2)           | 10,803 (15.0)   | 116,426 (17.5) |
| <b>Sex, n (%)</b>               |                         |                 |                |
| Males                           | 259,002 (46.0)          | 27,484 (38.1)   | 270,243 (40.6) |
| Females                         | 304,269 (54.0)          | 44,659 (61.9)   | 395,512 (59.4) |
| <b>Income quintile, n (%)</b>   |                         |                 |                |
| 1st (Lowest)                    | 74,570 (13.2)           | 19,335 (26.8)   | 152,780 (22.9) |
| 2nd                             | 43,965 (7.8)            | 15,169 (21.0)   | 137,980 (20.7) |
| 3rd                             | 40,479 (7.2)            | 13,916 (19.3)   | 131,971 (19.8) |
| 4th                             | 45,859 (8.1)            | 12,295 (17.0)   | 123,421 (18.5) |
| 5th (Highest)                   | 126,662 (22.5)          | 10,244 (14.2)   | 116,783 (17.5) |
| Missing                         | 231,736 (41.1)          | 1,184 (1.6)     | 2,820 (0.4)    |
| <b>Area of residence, n (%)</b> |                         |                 |                |
| Rural                           | 71,057 (12.6)           | 31,228 (43.3)   | 82,452 (12.4)  |
| Urban                           | 492,214 (87.4)          | 40,903 (56.7)   | 580,772 (87.2) |
| Missing                         | 0 (0.0)                 | 12 (0.0)        | 2,531 (0.4)    |

**Abbreviation:** SD: standard deviation

**Table S4. Characteristics of emergency department (ED) cohort by province**

| <b>Characteristic</b>           | <b>British Columbia</b> | <b>Manitoba</b> | <b>Ontario</b>   |
|---------------------------------|-------------------------|-----------------|------------------|
| <b>Patients, N</b>              | 534,607                 | 166,158         | 2,472,119        |
| <b>Age, years</b>               |                         |                 |                  |
| Mean (SD)                       | 44.0 (23.5)             | 42.0 (24.2)     | 43.3 (23.5)      |
| <65, n (%)                      | 416,553 (77.92)         | 131,468 (79.1)  | 1,948,851 (78.8) |
| 65-79, n (%)                    | 79,409 (14.9)           | 23,208 (14.0)   | 361,389 (14.6)   |
| 80+, n (%)                      | 38,645 (7.2)            | 11,482 (6.9)    | 161,879 (6.5)    |
| <b>Sex, n (%)</b>               |                         |                 |                  |
| Males                           | 260,531 (48.7)          | 78,692 (47.4)   | 1,181,949 (47.8) |
| Females                         | 274,076 (51.3)          | 87,466 (52.6)   | 1,290,170 (52.2) |
| <b>Income quintile, n (%)</b>   |                         |                 |                  |
| 1st (Lowest)                    | 56,441 (10.6)           | 41,294 (24.9)   | 541,669 (21.9)   |
| 2nd                             | 28,257 (5.3)            | 32,655 (19.7)   | 498,663 (20.2)   |
| 3rd                             | 26,088 (4.9)            | 28,540 (17.2)   | 494,497 (20.0)   |
| 4th                             | 30,000 (5.6)            | 31,424 (18.9)   | 478,641 (19.4)   |
| 5th (Highest)                   | 91,536 (17.1)           | 30,296 (18.2)   | 448,355 (18.1)   |
| Missing                         | 302,285 (56.5)          | 1,949 (1.2)     | 10,294 (0.4)     |
| <b>Area of residence, n (%)</b> |                         |                 |                  |
| Rural                           | 15,314 (2.9)            | 61,009 (36.7)   | 366,131 (14.8)   |
| Urban                           | 519,293 (97.2)          | 105,130 (63.3)  | 2,097,009 (84.8) |
| Missing                         | 0 (0.0)                 | 19 (0.0)        | 8,979 (0.4)      |

**Abbreviation:** SD: standard deviation

**Table S5. Characteristics of outpatient cohort by province**

| <b>Characteristic</b>           | <b>British Columbia</b> | <b>Manitoba</b> | <b>Ontario</b>   |
|---------------------------------|-------------------------|-----------------|------------------|
| <b>Patients, N</b>              | 3,957,380               | 995,070         | 10,186,924       |
| <b>Age, years</b>               |                         |                 |                  |
| Mean (SD)                       | 45.6 (22.9)             | 42.4 (23.7)     | 44.2 (23.4)      |
| <65, n (%)                      | 3,013,785 (76.2)        | 791,630 (79.6)  | 7,947,374 (78.0) |
| 65-79, n (%)                    | 701,382 (17.7)          | 151,703 (15.2)  | 1,653,837 (16.2) |
| 80+, n (%)                      | 242,213 (6.1)           | 51,737 (5.2)    | 585,713 (5.7)    |
| <b>Sex, n (%)</b>               |                         |                 |                  |
| Males                           | 1,838,783 (46.5)        | 457,319 (46.0)  | 4,630,592 (45.5) |
| Females                         | 2,118,597 (53.5)        | 537,751 (54.0)  | 5,556,332 (54.5) |
| <b>Income quintile, n (%)</b>   |                         |                 |                  |
| 1st (Lowest)                    | 354,954 (9.0)           | 186,810 (18.8)  | 1,921,604 (18.9) |
| 2nd                             | 201,328 (5.1)           | 194,547 (19.5)  | 1,974,778 (19.4) |
| 3rd                             | 194,709 (4.9)           | 203,330 (20.4)  | 2,062,403 (20.2) |
| 4th                             | 231,708 (5.9)           | 197,987 (19.9)  | 2,093,465 (20.6) |
| 5th (Highest)                   | 745,651 (18.8)          | 203,409 (20.4)  | 2,094,745 (20.6) |
| Missing                         | 2,229,030 (56.3)        | 8,987 (0.9)     | 39,929 (0.4)     |
| <b>Area of residence, n (%)</b> |                         |                 |                  |
| Rural                           | 412,296 (10.4)          | 348,274 (35.0)  | 929,450 (9.1)    |
| Urban                           | 3,545,084 (89.6)        | 646,683 (65.0)  | 9,221,005 (90.5) |
| Missing                         | 0 (0.0)                 | 113 (0.0)       | 36,469 (0.4)     |

**Abbreviation:** SD: standard deviation

**Table S6. Frequency (%) and rates of COVID-19 PCR tests and positive PCR tests by quarter (Q) and month**

|                                                    | Q1           |              |                |
|----------------------------------------------------|--------------|--------------|----------------|
|                                                    | April 2020   | May 2020     | June 2020      |
| <b>British Columbia</b>                            |              |              |                |
| COVID-19 PCR tests, n                              | 46,442       | 53,819       | 49,586         |
| Positive COVID-19 PCR tests, n (%)                 | 1,342 (2.9)  | 743 (1.4)    | 388 (0.8)      |
| COVID-19 PCR tests per 10,000 population*          | 91           | 105          | 96             |
| Positive COVID-19 PCR tests per 10,000 population* | 3            | 1            | 1              |
| <b>Manitoba</b>                                    |              |              |                |
| COVID-19 PCR tests, n                              | 10,096       | 13,480       | 13,262         |
| Positive COVID-19 PCR tests, n (%)                 | 69 (0.7)     | 16 (0.1)     | 14 (0.1)       |
| COVID-19 PCR tests per 10,000 population*          | 73           | 97           | 99             |
| Positive COVID-19 PCR tests per 10,000 population* | 1            | 0.1          | 0.1            |
| <b>Ontario</b>                                     |              |              |                |
| COVID-19 PCR tests, n                              | 246,303      | 382,865      | 660,301        |
| Positive COVID-19 PCR tests, n (%)                 | 18,719 (7.6) | 16,199 (4.2) | 8,582 (1.3)    |
| COVID-19 PCR tests per 10,000 population*          | 162          | 252          | 435            |
| Positive COVID-19 PCR tests per 10,000 population* | 12           | 11           | 6              |
|                                                    | Q2           |              |                |
|                                                    | July 2020    | August 2020  | September 2020 |
| <b>British Columbia</b>                            |              |              |                |
| COVID-19 PCR tests, n                              | 69,974       | 92,338       | 146,203        |
| Positive COVID-19 PCR tests, n (%)                 | 849 (1.2)    | 2,236 (2.4)  | 3,565 (2.4)    |
| COVID-19 PCR tests per 10,000 population*          | 136          | 180          | 284            |
| Positive COVID-19 PCR tests per 10,000 population* | 2            | 4            | 7              |
| <b>Manitoba</b>                                    |              |              |                |
| COVID-19 PCR tests, n                              | 18,772       | 28,376       | 29,920         |
| Positive COVID-19 PCR tests, n (%)                 | 64 (0.3)     | 489 (1.7)    | 531 (1.8)      |
| COVID-19 PCR tests per 10,000 population*          | 135          | 204          | 215            |
| Positive COVID-19 PCR tests per 10,000 population* | 1            | 4            | 4              |
| <b>Ontario</b>                                     |              |              |                |
| COVID-19 PCR tests, n                              | 702,302      | 695,185      | 998,664        |
| Positive COVID-19 PCR tests, n (%)                 | 4,798 (0.7)  | 3,575 (0.5)  | 12,041 (1.2)   |
| COVID-19 PCR tests per 10,000 population*          | 462          | 456          | 654            |
| Positive COVID-19 PCR tests per 10,000 population* | 3            | 2            | 8              |
|                                                    | Q3           |              |                |

|                                                    | October 2020 | November 2020 | December 2020 |
|----------------------------------------------------|--------------|---------------|---------------|
| <b>British Columbia</b>                            |              |               |               |
| COVID-19 PCR tests, n                              | 198,655      | 242,841       | 232,560       |
| Positive COVID-19 PCR tests, n (%)                 | 6,458 (3.3)  | 20,193 (8.3)  | 18,883 (8.1)  |
| COVID-19 PCR tests per 10,000 population*          | 386          | 470           | 450           |
| Positive COVID-19 PCR tests per 10,000 population* | 13           | 39            | 37            |
| <b>Manitoba</b>                                    |              |               |               |
| COVID-19 PCR tests, n                              | 45,569       | 56,524        | 40,037        |
| Positive COVID-19 PCR tests, n (%)                 | 2,706 (5.9)  | 7,099 (12.6)  | 4,310 (10.8)  |
| COVID-19 PCR tests per 10,000 population*          | 328          | 406           | 288           |
| Positive COVID-19 PCR tests per 10,000 population* | 19           | 51            | 31            |
| <b>Ontario</b>                                     |              |               |               |
| COVID-19 PCR tests, n                              | 983,112      | 1,045,716     | 1,457,041     |
| Positive COVID-19 PCR tests, n (%)                 | 24,548 (2.5) | 43,514 (4.2)  | 71,071 (4.8)  |
| COVID-19 PCR tests per 10,000 population*          | 643          | 683           | 951           |
| Positive COVID-19 PCR tests per 10,000 population* | 16           | 28            | 46            |
| <b>Q4</b>                                          |              |               |               |
|                                                    | January 2021 | February 2021 | March 2021    |
| <b>British Columbia</b>                            |              |               |               |
| COVID-19 PCR tests, n                              | 196,609      | 175,432       | 203,192       |
| Positive COVID-19 PCR tests, n (%)                 | 15,204 (7.7) | 13,165 (7.5)  | 20,566 (10.1) |
| COVID-19 PCR tests per 10,000 population*          | 379          | 338           | 390           |
| Positive COVID-19 PCR tests per 10,000 population* | 29           | 25            | 40            |
| <b>Manitoba</b>                                    |              |               |               |
| COVID-19 PCR tests, n                              | 33,323       | 29,515        | 36,338        |
| Positive COVID-19 PCR tests, n (%)                 | 2,485 (7.5)  | 1,048 (3.6)   | 1,033 (2.8)   |
| COVID-19 PCR tests per 10,000 population*          | 240          | 21            | 261           |
| Positive COVID-19 PCR tests per 10,000 population* | 18           | 1             | 7             |
| <b>Ontario</b>                                     |              |               |               |
| COVID-19 PCR tests, n                              | 1,372,756    | 1,184,112     | 1,396,884     |
| Positive COVID-19 PCR tests, n (%)                 | 78,116 (5.7) | 32,693 (2.8)  | 54,260 (3.9)  |
| COVID-19 PCR tests per 10,000 population*          | 896          | 772           | 910           |
| Positive COVID-19 PCR tests per 10,000 population* | 51           | 21            | 35            |

\*Note: maximum of one test per person per day

**Table S7. COVID-19 diagnosed cases by province and quarter (Q): inpatient cohort**

| <b>Case Type</b>        | <b>Q1<br/>(Apr 2020 –<br/>Jun 2020)</b> | <b>Q2<br/>(Jul 2020 –<br/>Sept 2020)</b> | <b>Q3<br/>(Oct 2020 –<br/>Dec 2020)</b> | <b>Q4<br/>(Jan 2021 –<br/>Mar 2021)</b> |
|-------------------------|-----------------------------------------|------------------------------------------|-----------------------------------------|-----------------------------------------|
| <b>British Columbia</b> |                                         |                                          |                                         |                                         |
| True Positive           | 260                                     | 134                                      | 952                                     | 1,400                                   |
| False Positive          | 607                                     | 618                                      | 1,076                                   | 975                                     |
| False Negative          | 34                                      | 105                                      | 880                                     | 1,216                                   |
| True Negative           | 23,447                                  | 25,737                                   | 42,290                                  | 57,899                                  |
| <b>Total</b>            | <b>24,348</b>                           | <b>26,594</b>                            | <b>45,198</b>                           | <b>61,490</b>                           |
| <b>Manitoba</b>         |                                         |                                          |                                         |                                         |
| True Positive           | s                                       | 86                                       | 752                                     | 280                                     |
| False Positive          | 28                                      | 56                                       | 606                                     | 242                                     |
| False Negative          | s                                       | 28                                       | 520                                     | 301                                     |
| True Negative           | 6,251                                   | 7,841                                    | 12,172                                  | 15,767                                  |
| <b>Total</b>            | <b>6,306</b>                            | <b>8,011</b>                             | <b>14,050</b>                           | <b>16,590</b>                           |
| <b>Ontario</b>          |                                         |                                          |                                         |                                         |
| True Positive           | 2,862                                   | 707                                      | 3,170                                   | 6,350                                   |
| False Positive          | 954                                     | 253                                      | 1,475                                   | 2,869                                   |
| False Negative          | 468                                     | 261                                      | 1,920                                   | 2,592                                   |
| True Negative           | 81,835                                  | 113,828                                  | 122,061                                 | 140,211                                 |
| <b>Total</b>            | <b>86,119</b>                           | <b>115,049</b>                           | <b>128,626</b>                          | <b>152,022</b>                          |

**Abbreviation:** s = suppressed cell for values under 6



**Table S8. COVID-19 diagnosed cases by province and quarter (Q): emergency department (ED) cohort**

| <b>Case Type</b>        | <b>Q1<br/>(Apr 2020 –<br/>Jun 2020)</b> | <b>Q2<br/>(Jul 2020 –<br/>Sept 2020)</b> | <b>Q3<br/>(Oct 2020 –<br/>Dec 2020)</b> | <b>Q4<br/>(Jan 2021 –<br/>Mar 2021)</b> |
|-------------------------|-----------------------------------------|------------------------------------------|-----------------------------------------|-----------------------------------------|
| <b>British Columbia</b> |                                         |                                          |                                         |                                         |
| True Positive           | 140                                     | 336                                      | 1,207                                   | 1,024                                   |
| False Positive          | 37                                      | 84                                       | 759                                     | 740                                     |
| False Negative          | 127                                     | 422                                      | 2,593                                   | 2,544                                   |
| True Negative           | 20,068                                  | 28,937                                   | 40,888                                  | 38,628                                  |
| <b>Total</b>            | <b>20,372</b>                           | <b>29,779</b>                            | <b>45,447</b>                           | <b>42,936</b>                           |
| <b>Manitoba</b>         |                                         |                                          |                                         |                                         |
| True Positive           | 0                                       | s                                        | 223                                     | 109                                     |
| False Positive          | 9                                       | s                                        | 428                                     | 164                                     |
| False Negative          | 18                                      | 148                                      | 2,032                                   | 833                                     |
| True Negative           | 9,539                                   | 12,920                                   | 15,371                                  | 14,451                                  |
| <b>Total</b>            | <b>9,566</b>                            | <b>13,100</b>                            | <b>18,054</b>                           | <b>15,557</b>                           |
| <b>Ontario</b>          |                                         |                                          |                                         |                                         |
| True Positive           | 3,653                                   | 1,645                                    | 11,710                                  | 11,073                                  |
| False Positive          | 1,094                                   | 423                                      | 2,688                                   | 4,755                                   |
| False Negative          | 2,338                                   | 1,499                                    | 8,118                                   | 10,104                                  |
| True Negative           | 168,109                                 | 264,129                                  | 233,122                                 | 223,935                                 |
| <b>Total</b>            | <b>175,194</b>                          | <b>267,696</b>                           | <b>255,638</b>                          | <b>249,867</b>                          |

**Abbreviation:** s = suppressed cell for values under 6

**Table S9. COVID-19 diagnosed cases by province and quarter (Q): outpatient cohort**

| <b>Case Type</b>        | <b>Q1<br/>(Apr 2020 –<br/>Jun 2020)</b> | <b>Q2<br/>(Jul 2020 –<br/>Sept 2020)</b> | <b>Q3<br/>(Oct 2020 –<br/>Dec 2020)</b> | <b>Q4<br/>(Jan 2021 –<br/>Mar 2021)</b> |
|-------------------------|-----------------------------------------|------------------------------------------|-----------------------------------------|-----------------------------------------|
| <b>British Columbia</b> |                                         |                                          |                                         |                                         |
| True Positive           | 145                                     | 311                                      | 854                                     | 996                                     |
| False Positive          | 13,937                                  | 20,101                                   | 14,453                                  | 6,724                                   |
| False Negative          | 1,274                                   | 4,826                                    | 35,541                                  | 39,252                                  |
| True Negative           | 107,086                                 | 221,715                                  | 448,235                                 | 373,009                                 |
| <b>Total</b>            | <b>122,442</b>                          | <b>246,953</b>                           | <b>499,083</b>                          | <b>419,981</b>                          |
| <b>Manitoba</b>         |                                         |                                          |                                         |                                         |
| True Positive           | s                                       | 15                                       | 526                                     | 203                                     |
| False Positive          | 169                                     | 165                                      | 3,237                                   | 3,332                                   |
| False Negative          | s                                       | 877                                      | 10,108                                  | 3,002                                   |
| True Negative           | 31,038                                  | 64,504                                   | 93,690                                  | 65,535                                  |
| <b>Total</b>            | <b>31,286</b>                           | <b>65,561</b>                            | <b>107,561</b>                          | <b>72,072</b>                           |
| <b>Ontario</b>          |                                         |                                          |                                         |                                         |
| True Positive           | 4,095                                   | 1,955                                    | 26,096                                  | 32,389                                  |
| False Positive          | 44,223                                  | 59,352                                   | 90,070                                  | 71,676                                  |
| False Negative          | 15,278                                  | 7,794                                    | 52,999                                  | 58,681                                  |
| True Negative           | 542,811                                 | 886,211                                  | 1,040,493                               | 1,027,919                               |
| <b>Total</b>            | <b>606,407</b>                          | <b>955,312</b>                           | <b>1,209,658</b>                        | <b>1,190,665</b>                        |

**Abbreviation:** s = suppressed cell for values under 6

**Table S10. Overall validation estimates (95% confidence intervals) by age group, sex, and quarter (Q): inpatient cohort**

|                                  | Sensitivity       | Specificity       | PPV               | NPV               |
|----------------------------------|-------------------|-------------------|-------------------|-------------------|
| <b>Q1 (Apr 2020 – Jun 2020)</b>  |                   |                   |                   |                   |
| <b>Age Group</b>                 |                   |                   |                   |                   |
| <65                              | 83.9 (80.5, 87.3) | 98.6 (98.4, 98.7) | 60.1 (57.0, 63.2) | 99.6 (99.5, 99.7) |
| 65-79                            | 89.2 (86.1, 92.4) | 98.7 (98.4, 98.9) | 69.0 (65.5, 72.5) | 99.6 (99.5, 99.7) |
| 80+                              | 86.0 (82.6, 89.4) | 98.6 (98.3, 98.8) | 72.2 (68.7, 75.7) | 99.4 (99.3, 99.5) |
| <b>Sex</b>                       |                   |                   |                   |                   |
| Male                             | 88.2 (85.7, 90.7) | 98.4 (98.2, 98.6) | 65.5 (62.8, 68.1) | 99.6 (99.5, 99.7) |
| Female                           | 83.8 (80.8, 86.8) | 98.8 (98.6, 98.9) | 67.6 (64.7, 70.5) | 99.5 (99.4, 99.6) |
| <b>Q2 (Jul 2020 – Sept 2020)</b> |                   |                   |                   |                   |
| <b>Age Group</b>                 |                   |                   |                   |                   |
| <65                              | 60.9 (54.1, 67.7) | 99.4 (99.3, 99.5) | 46.7 (41.7, 51.8) | 99.7 (99.6, 99.7) |
| 65-79                            | 76.4 (68.8, 84.0) | 99.3 (99.2, 99.5) | 48.5 (43.0, 54.0) | 99.8 (99.7, 99.9) |
| 80+                              | 79.1 (71.9, 86.3) | 99.3 (99.2, 99.5) | 56.5 (50.5, 62.5) | 99.8 (99.7, 99.8) |
| <b>Sex</b>                       |                   |                   |                   |                   |
| Male                             | 77.6 (72.1, 83.1) | 99.2 (99.1, 99.4) | 49.5 (45.4, 53.6) | 99.8 (99.7, 99.8) |
| Female                           | 62.7 (56.2, 69.1) | 99.5 (99.4, 99.6) | 50.6 (45.7, 55.6) | 99.7 (99.6, 99.7) |
| <b>Q3 (Oct 2020 – Dec 2020)</b>  |                   |                   |                   |                   |
| <b>Age Group</b>                 |                   |                   |                   |                   |
| <65                              | 46.0 (43.2, 48.8) | 98.3 (98.2, 98.5) | 52.1 (49.5, 54.7) | 97.8 (97.7, 98.0) |
| 65-79                            | 70.2 (66.9, 73.4) | 98.2 (98.0, 98.4) | 63.4 (60.6, 66.2) | 98.6 (98.5, 98.8) |
| 80+                              | 70.7 (67.5, 74.0) | 98.2 (97.9, 98.4) | 70.1 (67.2, 73.0) | 98.2 (98.0, 98.4) |
| <b>Sex</b>                       |                   |                   |                   |                   |
| Male                             | 66.5 (64.0, 69.0) | 97.9 (97.7, 98.1) | 60.4 (58.3, 62.5) | 98.4 (98.3, 98.5) |
| Female                           | 52.6 (50.0, 55.3) | 98.6 (98.4, 98.7) | 61.1 (58.6, 63.5) | 98.0 (97.9, 98.1) |
| <b>Q4 (Jan 2021 – Mar 2021)</b>  |                   |                   |                   |                   |
| <b>Age Group</b>                 |                   |                   |                   |                   |
| <65                              | 50.6 (48.3, 52.9) | 98.2 (98.1, 98.3) | 56.7 (54.5, 58.8) | 97.7 (97.6, 97.8) |
| 65-79                            | 76.9 (74.5, 79.3) | 98.1 (97.9, 98.3) | 69.9 (67.7, 72.1) | 98.7 (98.5, 98.8) |
| 80+                              | 80.4 (78.0, 82.7) | 97.9 (97.7, 98.2) | 75.6 (73.4, 77.9) | 98.4 (98.2, 98.6) |
| <b>Sex</b>                       |                   |                   |                   |                   |
| Male                             | 72.4 (70.5, 74.4) | 97.8 (97.6, 97.9) | 66.6 (64.9, 68.3) | 98.3 (98.2, 98.4) |
| Female                           | 59.8 (57.7, 62.0) | 98.4 (98.3, 98.6) | 65.9 (64.0, 67.8) | 98.0 (97.9, 98.1) |

**Abbreviations:** PPV: Positive predictive value; NPV: Negative predictive value

**Table S11. Overall validation estimates (95% confidence intervals) by age group, sex, and quarter (Q): emergency department (ED) cohort**

|                                  | Sensitivity       | Specificity       | PPV               | NPV               |
|----------------------------------|-------------------|-------------------|-------------------|-------------------|
| <b>Q1 (Apr 2020 – Jun 2020)</b>  |                   |                   |                   |                   |
| <b>Age Group</b>                 |                   |                   |                   |                   |
| <65                              | 63.5 (61.2, 65.8) | 99.4 (99.3, 99.5) | 78.0 (76.0, 80.0) | 98.8 (98.7, 98.8) |
| 65-79                            | 55.7 (49.5, 61.8) | 99.6 (99.5, 99.7) | 76.7 (70.9, 82.4) | 99.0 (98.9, 99.1) |
| 80+                              | 35.7 (28.3, 43.1) | 99.4 (99.2, 99.6) | 60.4 (51.3, 69.4) | 98.3 (98.2, 98.5) |
| <b>Sex</b>                       |                   |                   |                   |                   |
| Male                             | 63.9 (60.9, 66.9) | 99.5 (99.4, 99.6) | 80.3 (77.7, 82.9) | 98.8 (98.7, 98.9) |
| Female                           | 57.4 (54.5, 60.3) | 99.4 (99.3, 99.5) | 74.0 (71.3, 76.6) | 98.7 (98.6, 98.8) |
| <b>Q2 (Jul 2020 – Sept 2020)</b> |                   |                   |                   |                   |
| <b>Age Group</b>                 |                   |                   |                   |                   |
| <65                              | 49.3 (46.5, 52.2) | 99.8 (99.8, 99.8) | 78.9 (76.1, 81.7) | 99.3 (99.2, 99.3) |
| 65-79                            | 50.4 (41.5, 59.4) | 99.9 (99.8, 99.9) | 78.4 (69.7, 87.0) | 99.6 (99.5, 99.6) |
| 80+                              | 36.9 (23.5, 50.3) | 99.9 (99.8, 100)  | 73.3 (56.9, 89.8) | 99.5 (99.5, 99.6) |
| <b>Sex</b>                       |                   |                   |                   |                   |
| Male                             | 49.4 (45.6, 53.1) | 99.8 (99.8, 99.9) | 80.0 (76.4, 83.7) | 99.3 (99.2, 99.3) |
| Female                           | 48.6 (44.9, 52.4) | 99.8 (99.8, 99.9) | 77.5 (73.8, 81.3) | 99.4 (99.3, 99.4) |
| <b>Q3 (Oct 2020 – Dec 2020)</b>  |                   |                   |                   |                   |
| <b>Age Group</b>                 |                   |                   |                   |                   |
| <65                              | 52.5 (51.3, 53.7) | 98.6 (98.6, 98.7) | 77.9 (76.8, 79.0) | 95.8 (95.7, 95.9) |
| 65-79                            | 48.2 (45.0, 51.3) | 98.8 (98.6, 99.0) | 75.5 (72.4, 78.6) | 96.1 (95.9, 96.3) |
| 80+                              | 31.3 (27.2, 35.4) | 99.0 (98.8, 99.2) | 68.4 (62.7, 74.0) | 95.4 (95.1, 95.6) |
| <b>Sex</b>                       |                   |                   |                   |                   |
| Male                             | 53.8 (52.3, 55.3) | 98.6 (98.5, 98.7) | 79.3 (78.0, 80.7) | 95.6 (95.5, 95.8) |
| Female                           | 47.9 (46.4, 49.4) | 98.7 (98.6, 98.8) | 75.1 (73.6, 76.6) | 95.9 (95.8, 96.0) |
| <b>Q4 (Jan 2021 – Mar 2021)</b>  |                   |                   |                   |                   |
| <b>Age Group</b>                 |                   |                   |                   |                   |
| <65                              | 47.8 (46.7, 49.0) | 97.8 (97.7, 97.9) | 68.1 (66.9, 69.3) | 95.1 (95.0, 95.2) |
| 65-79                            | 50.1 (47.0, 53.1) | 98.4 (98.2, 98.6) | 69.9 (66.8, 72.9) | 96.3 (96.1, 96.5) |
| 80+                              | 37.1 (32.7, 41.5) | 99.0 (98.8, 99.2) | 68.8 (63.4, 74.1) | 96.3 (96.1, 96.6) |
| <b>Sex</b>                       |                   |                   |                   |                   |
| Male                             | 48.4 (46.8, 49.9) | 97.9 (97.8, 98.0) | 69.9 (68.3, 71.4) | 94.9 (94.8, 95.1) |
| Female                           | 46.7 (45.2, 48.2) | 98.1 (98.0, 98.2) | 66.9 (65.3, 68.4) | 95.7 (95.6, 95.8) |

**Abbreviations:** PPV: Positive predictive value; NPV: Negative predictive value

**Table S12. Overall validation estimates (95% confidence intervals) by age group, sex, and quarter (Q): outpatient cohort**

|                                  | Sensitivity       | Specificity       | PPV               | NPV               |
|----------------------------------|-------------------|-------------------|-------------------|-------------------|
| <b>Q1 (Apr 2020 – Jun 2020)</b>  |                   |                   |                   |                   |
| <b>Age Group</b>                 |                   |                   |                   |                   |
| <65                              | 26.0 (24.7, 27.3) | 90.6 (90.4, 90.7) | 7.0 (6.6, 7.3)    | 97.8 (97.8, 97.9) |
| 65-79                            | 13.0 (10.9, 15.1) | 94.1 (93.9, 94.3) | 4.3 (3.7, 5.0)    | 98.1 (98.1, 98.2) |
| 80+                              | 8.7 (7.3, 10.1)   | 96.4 (96.2, 96.6) | 9.4 (8.0, 10.9)   | 96.1 (96.1, 96.2) |
| <b>Sex</b>                       |                   |                   |                   |                   |
| Male                             | 20.6 (19.2, 22.1) | 91.6 (91.4, 91.8) | 6.9 (6.4, 7.4)    | 97.5 (97.4, 97.5) |
| Female                           | 20.1 (18.9, 21.3) | 92.4 (92.3, 92.6) | 6.7 (6.3, 7.1)    | 97.7 (97.7, 97.8) |
| <b>Q2 (Jul 2020 – Sept 2020)</b> |                   |                   |                   |                   |
| <b>Age Group</b>                 |                   |                   |                   |                   |
| <65                              | 15.3 (14.3, 16.4) | 92.9 (92.8, 93.0) | 2.9 (2.7, 3.1)    | 98.7 (98.7, 98.8) |
| 65-79                            | 21.1 (17.0, 25.1) | 96.6 (96.5, 96.8) | 3.9 (3.2, 4.6)    | 99.5 (99.4, 99.5) |
| 80+                              | 5.0 (2.2, 7.8)    | 97.4 (97.2, 97.6) | 1.5 (0.7, 2.4)    | 99.2 (99.2, 99.2) |
| <b>Sex</b>                       |                   |                   |                   |                   |
| Male                             | 14.6 (13.2, 16.0) | 93.2 (93.1, 93.3) | 3.1 (2.8, 3.4)    | 98.7 (98.7, 98.7) |
| Female                           | 14.3 (13.0, 15.6) | 93.9 (93.8, 94.0) | 2.6 (2.3, 2.8)    | 99.0 (99.0, 99.0) |
| <b>Q3 (Oct 2020 – Dec 2020)</b>  |                   |                   |                   |                   |
| <b>Age Group</b>                 |                   |                   |                   |                   |
| <65                              | 23.5 (23.0, 23.9) | 93.1 (93.0, 93.1) | 20.5 (20.1, 20.8) | 94.1 (94.1, 94.1) |
| 65-79                            | 26.5 (25.1, 27.9) | 95.8 (95.7, 96.0) | 25.9 (24.7, 27.1) | 95.9 (95.9, 96.0) |
| 80+                              | 9.5 (8.4, 10.6)   | 96.9 (96.7, 97.1) | 19.3 (17.3, 21.2) | 93.2 (93.1, 93.3) |
| <b>Sex</b>                       |                   |                   |                   |                   |
| Male                             | 23.0 (22.4, 23.5) | 92.9 (92.8, 93.0) | 21.7 (21.2, 22.2) | 93.4 (93.3, 93.4) |
| Female                           | 20.8 (20.2, 21.3) | 94.1 (94.0, 94.2) | 19.1 (18.7, 19.6) | 94.6 (94.6, 94.7) |
| <b>Q4 (Jan 2021 – Mar 2021)</b>  |                   |                   |                   |                   |
| <b>Age Group</b>                 |                   |                   |                   |                   |
| <65                              | 25.9 (25.5, 26.4) | 94.8 (94.7, 94.8) | 31.9 (31.4, 32.3) | 93.1 (93.1, 93.2) |
| 65-79                            | 33.9 (32.4, 35.3) | 95.0 (94.9, 95.2) | 26.7 (25.6, 27.7) | 96.4 (96.3, 96.5) |
| 80+                              | 14.9 (13.4, 16.4) | 94.3 (94.0, 94.5) | 12.9 (11.7, 14.1) | 95.1 (95.0, 95.2) |
| <b>Sex</b>                       |                   |                   |                   |                   |
| Male                             | 25.6 (25.0, 26.2) | 94.4 (94.3, 94.5) | 31.5 (30.9, 32.1) | 92.6 (92.5, 92.7) |
| Female                           | 24.4 (23.9, 25.0) | 95.0 (94.9, 95.1) | 27.2 (26.7, 27.7) | 94.2 (94.2, 94.3) |

**Abbreviations:** PPV: Positive predictive value; NPV: Negative predictive value

**Table S13. Sensitivity analyses of validation estimates (95% confidence intervals) for the inpatient cohort: positive test no more than 7 days before hospital admission date or before discharge date**

| <b>Measure</b>          | <b>Q1<br/>(Apr 2020 – Jun 2020)</b> | <b>Q2<br/>(Jul 2020 – Sept 2020)</b> | <b>Q3<br/>(Oct 2020 – Dec 2020)</b> | <b>Q4<br/>(Jan 2021 – Mar 2021)</b> |
|-------------------------|-------------------------------------|--------------------------------------|-------------------------------------|-------------------------------------|
| <b>British Columbia</b> |                                     |                                      |                                     |                                     |
| <b>Sensitivity</b>      | 97.3 (95.5, 99.2)                   | 95.7 (92.9, 98.6)                    | 98.0 (97.2, 98.7)                   | 95.3 (94.4, 96.2)                   |
| <b>Specificity</b>      | 97.1 (96.9, 97.4)                   | 97.2 (97.0, 97.4)                    | 97.9 (97.8, 98.1)                   | 99.1 (99.1, 99.2)                   |
| <b>PPV</b>              | 33.3 (30.2, 36.5)                   | 23.9 (20.9, 27.0)                    | 67.1 (65.0, 69.1)                   | 81.0 (79.4, 82.6)                   |
| <b>NPV</b>              | 99.9 (99.9, 100.0)                  | 100.0 (99.9, 100.0)                  | 99.9 (99.9, 99.9)                   | 99.8 (99.8, 99.9)                   |
| <b>Manitoba</b>         |                                     |                                      |                                     |                                     |
| <b>Sensitivity</b>      | 90.3 (79.9, 100)                    | 80.4 (73.9, 86.9)                    | 69.7 (67.5, 71.9)                   | 60.2 (56.7, 63.7)                   |
| <b>Specificity</b>      | 99.6 (99.5, 99.8)                   | 99.7 (99.5, 99.8)                    | 98.7 (98.5, 98.9)                   | 99.6 (99.5, 99.7)                   |
| <b>PPV</b>              | 53.9 (40.3, 67.4)                   | 81.0 (74.5, 87.4)                    | 88.0 (86.3, 89.7)                   | 87.2 (84.3, 90.0)                   |
| <b>NPV</b>              | 99.9 (99.9, 100)                    | 99.6 (99.5, 99.8)                    | 95.9 (95.6, 96.2)                   | 98.1 (97.9, 98.3)                   |
| <b>Ontario</b>          |                                     |                                      |                                     |                                     |
| <b>Sensitivity</b>      | 88.3 (87.3, 89.3)                   | 76.7 (74.2, 79.2)                    | 68.7 (67.5, 69.8)                   | 76.2 (75.5, 77.0)                   |
| <b>Specificity</b>      | 99.6 (99.6, 99.7)                   | 99.9 (99.9, 99.9)                    | 99.6 (99.6, 99.7)                   | 99.4 (99.3, 99.4)                   |
| <b>PPV</b>              | 92.5 (91.7, 93.4)                   | 89.6 (87.7, 91.5)                    | 90.6 (89.8, 91.5)                   | 90.2 (89.6, 90.8)                   |
| <b>NPV</b>              | 99.4 (99.4, 99.5)                   | 99.8 (99.7, 99.8)                    | 98.5 (98.4, 98.5)                   | 98.2 (98.1, 98.3)                   |
| <b>All</b>              |                                     |                                      |                                     |                                     |
| <b>Sensitivity</b>      | 88.9 (87.3, 90.5)                   | 79.6 (76.0, 83.1)                    | 73.3 (71.7, 74.8)                   | 78.2 (77.0, 79.4)                   |
| <b>Specificity</b>      | 99.2 (99.1, 99.3)                   | 99.5 (99.5, 99.6)                    | 99.2 (99.2, 99.3)                   | 99.3 (99.3, 99.4)                   |
| <b>PPV</b>              | 81.3 (79.5, 83.0)                   | 62.3 (59.1, 65.5)                    | 84.2 (82.9, 85.5)                   | 88.3 (87.4, 89.2)                   |
| <b>NPV</b>              | 99.6 (99.5, 99.6)                   | 99.8 (99.8, 99.8)                    | 98.5 (98.5, 98.6)                   | 98.6 (98.5, 98.7)                   |

**Abbreviations:** Q: quarter; PV: Positive predictive value; NPV: Negative predictive value

**Table S14. Sensitivity analyses of validation estimates (95% confidence intervals) for the inpatient cohort: positive test no more than 14 days before admission date or 14 days after admission date**

| Measure                 | Q1<br>(Apr 2020 – Jun 2020) | Q2<br>(Jul 2020 – Sept 2020) | Q3<br>(Oct 2020 – Dec 2020) | Q4<br>(Jan 2021 – Mar 2021) |
|-------------------------|-----------------------------|------------------------------|-----------------------------|-----------------------------|
| <b>British Columbia</b> |                             |                              |                             |                             |
| <b>Sensitivity</b>      | 90.1 (86.9, 93.2)           | 65.2 (59.9, 70.6)            | 64.0 (62.1, 65.9)           | 63.8 (62.2, 65.4)           |
| <b>Specificity</b>      | 97.7 (97.5, 97.9)           | 97.9 (97.7, 98.1)            | 98.9 (98.8, 99.0)           | 99.6 (99.6, 99.7)           |
| <b>PPV</b>              | 35.5 (32.3, 38.7)           | 26.2 (23.1, 29.3)            | 77.2 (75.4, 79.0)           | 90.3 (89.1, 91.5)           |
| <b>NPV</b>              | 99.9 (99.8, 99.9)           | 99.6 (99.5, 99.7)            | 98.0 (97.8, 98.1)           | 97.9 (97.8, 98.1)           |
| <b>Manitoba</b>         |                             |                              |                             |                             |
| <b>Sensitivity</b>      | 83.3 (66.1, 100)            | 71.1(62.1, 80.2)             | 69.0 (66.8, 71.2)           | 60.3 (56.9, 63.8)           |
| <b>Specificity</b>      | 99.4 (99.2, 99.6)           | 99.1 (98.9, 99.3)            | 98.4 (98.2, 98.6)           | 99.6 (99.5, 99.7)           |
| <b>PPV</b>              | 28.9 (16.5, 41.2)           | 48.6 (40.4, 56.8)            | 85.4 (83.5, 87.2)           | 87.7 (84.9, 90.5)           |
| <b>NPV</b>              | 100.0 (99.9, 100)           | 99.6 (99.5, 99.8)            | 95.9 (95.6, 96.2)           | 98.1 (97.9, 98.3)           |
| <b>Ontario</b>          |                             |                              |                             |                             |
| <b>Sensitivity</b>      | 88.5 (87.5, 89.4)           | 76.4 (73.9, 78.9)            | 69.4 (68.3, 70.5)           | 76.5 (75.8, 77.3)           |
| <b>Specificity</b>      | 99.7 (99.7, 99.8)           | 99.9 (99.9, 99.9)            | 99.8 (99.7, 99.8)           | 99.5 (99.4, 99.5)           |
| <b>PPV</b>              | 94.0 (93.2, 94.7)           | 87.8 (85.7, 89.9)            | 93.7 (93.0, 94.4)           | 91.8 (91.2, 92.3)           |
| <b>NPV</b>              | 99.4 (99.4, 99.5)           | 99.8 (99.7, 99.8)            | 98.5 (98.4, 98.5)           | 98.2 (98.1, 98.3)           |
| <b>All</b>              |                             |                              |                             |                             |
| <b>Sensitivity</b>      | 88.6 (86.9, 90.2)           | 73.8 (69.9, 77.6)            | 68.1 (66.5, 69.6)           | 72.9 (71.7, 74.1)           |
| <b>Specificity</b>      | 99.3 (99.2, 99.4)           | 99.5 (99.4, 99.6)            | 99.5 (99.4, 99.5)           | 99.5 (99.5, 99.6)           |
| <b>PPV</b>              | 82.6 (80.8, 84.3)           | 59.8 (56.6, 63.1)            | 88.1 (87.0, 89.3)           | 91.3 (90.5, 92.1)           |
| <b>NPV</b>              | 99.6 (99.5, 99.6)           | 99.7 (99.7, 99.8)            | 98.2 (98.1, 98.2)           | 98.1 (98.0, 98.2)           |

**Abbreviations:** Q: quarter; PV: Positive predictive value; NPV: Negative predictive value

**Table S15. Sensitivity analyses of validation estimates (95% confidence intervals) for the emergency department (ED) cohort: 5 days before or after specimen collection date**

| Measure                 | Q1<br>(Apr 2020 – Jun 2020) | Q2<br>(Jul 2020 – Sept 2020) | Q3<br>(Oct 2020 – Dec 2020) | Q4<br>(Jan 2021 – Mar 2021) |
|-------------------------|-----------------------------|------------------------------|-----------------------------|-----------------------------|
| <b>British Columbia</b> |                             |                              |                             |                             |
| <b>Sensitivity</b>      | 54.5 (48.6, 60.3)           | 46.1 (42.6, 49.6)            | 36.3 (34.8, 37.8)           | 33.1 (31.6, 34.6)           |
| <b>Specificity</b>      | 99.9 (99.8, 99.9)           | 99.8 (99.7, 99.8)            | 98.8 (98.7, 98.9)           | 98.7 (98.6, 98.8)           |
| <b>PPV</b>              | 85.9 (80.7, 91.0)           | 86.0 (82.6, 89.3)            | 75.1 (73.2, 77.0)           | 71.4 (69.3, 73.5)           |
| <b>NPV</b>              | 99.4 (99.3, 99.5)           | 98.6 (98.4, 98.7)            | 94.0 (93.8, 94.3)           | 93.8 (93.6, 94.1)           |
| <b>Manitoba</b>         |                             |                              |                             |                             |
| <b>Sensitivity</b>      | 10.0 (0.0, 23.1)            | 8.1 (3.9, 12.3)              | 15.5 (14.1, 17.0)           | 16.3 (14.0, 18.6)           |
| <b>Specificity</b>      | 99.9 (99.9, 100.0)          | 99.9 (99.8, 99.9)            | 98.2 (98.0, 98.4)           | 99.2 (99.1, 99.4)           |
| <b>PPV</b>              | 22.2 (0.0, 49.4)            | 39.4 (22.7, 56.1)            | 57.3 (53.5, 61.1)           | 59.3 (53.5, 65.2)           |
| <b>NPV</b>              | 99.8 (99.7, 99.9)           | 98.9 (98.7, 99.0)            | 88.3 (87.8, 88.8)           | 94.6 (94.2, 94.9)           |
| <b>Ontario</b>          |                             |                              |                             |                             |
| <b>Sensitivity</b>      | 63.1 (61.9, 64.3)           | 54.4 (52.7, 56.1)            | 61.1 (60.4, 61.7)           | 55.7 (55.0, 56.3)           |
| <b>Specificity</b>      | 99.6 (99.5, 99.6)           | 99.9 (99.9, 99.9)            | 99.3 (99.3, 99.3)           | 98.6 (98.6, 98.7)           |
| <b>PPV</b>              | 84.2 (83.2, 85.3)           | 86.5 (85.0, 88.0)            | 88.4 (87.9, 88.9)           | 80.1 (79.5, 80.8)           |
| <b>NPV</b>              | 98.6 (98.6, 98.7)           | 99.4 (99.4, 99.5)            | 96.6 (96.6, 96.7)           | 95.7 (95.6, 95.8)           |
| <b>All</b>              |                             |                              |                             |                             |
| <b>Sensitivity</b>      | 62.6 (60.6, 64.6)           | 51.1 (48.5, 53.7)            | 53.4 (52.3, 54.4)           | 51.1 (50.1, 52.2)           |
| <b>Specificity</b>      | 99.6 (99.6, 99.7)           | 99.9 (99.9, 99.9)            | 99.2 (99.1, 99.2)           | 98.7 (98.6, 98.7)           |
| <b>PPV</b>              | 84.2 (82.5, 85.9)           | 85.8 (83.5, 88.1)            | 85.7 (84.8, 86.5)           | 79.0 (78.0, 79.9)           |
| <b>NPV</b>              | 98.8 (98.7, 98.8)           | 99.3 (99.3, 99.4)            | 95.8 (95.7, 95.9)           | 95.4 (95.3, 95.5)           |

**Abbreviations:** Q: quarter; PV: Positive predictive value; NPV: Negative predictive value



**Table S16. Sensitivity analyses of validation estimates (95% confidence intervals) for the outpatient cohort: 5 days before or after specimen collection date**

| Measure                 | Q1<br>(Apr 2020 – Jun 2020) | Q2<br>(Jul 2020 – Sept 2020) | Q3<br>(Oct 2020 – Dec 2020) | Q4<br>(Jan 2021 – Mar 2021) |
|-------------------------|-----------------------------|------------------------------|-----------------------------|-----------------------------|
| <b>British Columbia</b> |                             |                              |                             |                             |
| <b>Sensitivity</b>      | 11.6 (9.9, 13.2)            | 6.6 (5.9, 7.2)               | 2.7 (2.5, 2.9)              | 2.7 (2.5, 2.9)              |
| <b>Specificity</b>      | 88.5 (88.3, 88.7)           | 91.7 (91.6, 91.8)            | 96.9 (96.9, 97.0)           | 98.3 (98.2, 98.3)           |
| <b>PPV</b>              | 1.2 (1.0, 1.4)              | 1.7 (1.5, 1.8)               | 6.4 (6.0, 6.8)              | 14.0 (13.3, 14.8)           |
| <b>NPV</b>              | 98.8 (98.8, 98.9)           | 97.9 (97.8, 97.9)            | 92.7 (92.6, 92.7)           | 90.5 (90.4, 90.6)           |
| <b>Manitoba</b>         |                             |                              |                             |                             |
| <b>Sensitivity</b>      | 3.8 (0.0, 8.0)              | 5.1 (3.7, 6.5)               | 9.3 (8.8, 9.8)              | 10.2 (9.2, 11.3)            |
| <b>Specificity</b>      | 99.5 (99.4, 99.5)           | 99.8 (99.8, 99.8)            | 97.2 (97.1, 97.3)           | 95.4 (95.2, 95.5)           |
| <b>PPV</b>              | 1.8 (0.0, 3.7)              | 26.1 (19.7, 32.5)            | 27.5 (26.1, 29.0)           | 9.7 (8.7, 10.6)             |
| <b>NPV</b>              | 99.8 (99.7, 99.8)           | 98.7 (98.6, 98.7)            | 90.3 (90.1, 90.4)           | 95.6 (95.5, 95.8)           |
| <b>Ontario</b>          |                             |                              |                             |                             |
| <b>Sensitivity</b>      | 30.0 (29.4, 30.6)           | 31.4 (30.5, 32.2)            | 41.3 (41.0, 41.6)           | 42.4 (42.1, 42.7)           |
| <b>Specificity</b>      | 92.9 (92.8, 92.9)           | 93.9 (93.8, 93.9)            | 93.0 (92.9, 93.0)           | 94.4 (94.4, 94.5)           |
| <b>PPV</b>              | 13.6 (13.3, 13.9)           | 5.8 (5.6, 6.0)               | 32.1 (31.8, 32.4)           | 41.5 (41.2, 41.8)           |
| <b>NPV</b>              | 97.3 (97.2, 97.3)           | 99.1 (99.1, 99.2)            | 95.2 (95.1, 95.2)           | 94.6 (94.6, 94.6)           |
| <b>All</b>              |                             |                              |                             |                             |
| <b>Sensitivity</b>      | 28.7 (27.2, 28.9)           | 30.4 (29.0, 31.8)            | 37.7 (37.2, 38.2)           | 41.1 (40.6, 41.6)           |
| <b>Specificity</b>      | 93.4 (93.3, 93.5)           | 94.4 (94.3, 94.5)            | 93.5 (93.4, 93.5)           | 94.6 (94.5, 94.7)           |
| <b>PPV</b>              | 11.6 (10.6, 12.5)           | 6.4 (6.1, 6.7)               | 32.6 (32.3, 33.0)           | 41.0 (40.5, 41.4)           |
| <b>NPV</b>              | 94.7 (94.7, 94.8)           | 99.1 (99.1, 99.1)            | 94.7 (94.7, 94.8)           | 94.6 (94.6, 94.7)           |

**Abbreviations:** Q: quarter; PV: Positive predictive value; NPV: Negative predictive value
