# Supplementary material for: Validity of diagnoses of SARS-CoV-2 infection in Canadian administrative health data: a multiprovince, population-based cohort study
Source: PubMed Central journal article supplement — CMAJ Open. 2023 Sep 5;11(5):E790–8. doi: 10.9778/cmajo.20220152 (PMC10482491; doi:10.9778/cmajo.20220152), 2023-09-05
Supplement: open-2022-0152-original-submission.pdf [file open-2022-0152-original-submission.pdf]

## Validity of COVID-19 Diagnoses in Canadian Administrative Health Data: A Multi-province, Population-based Study

Lisa M. Lix, Christel Renoux, Carolina Moriello, Ko Long Choi, Colin Dormuth, Anat Fisher, Matthew Dahl, Fangyun Wu, Ayesha Asaf, J. Michael Paterson, for the Canadian Network for Observational Drug Effect Studies (CNODES) Investigators\*

### Affiliations:

1. Lisa M. Lix, PhD: Department of Community Health Sciences, University of Manitoba, Winnipeg, Canada; lisa.lix@umanitoba.ca
2. Christel Renoux, MD, PhD: Lady Davis Institute, Montreal, Quebec, Canada, Departments of Neurology and Neurosurgery and Epidemiology, Biostatistics and Occupational Health, McGill University, Montreal, Quebec, Canada; christel.renoux@mcgill.ca
3. Carolina Moriello, MSc, Lady Davis Institute, Montreal, Quebec, Canada; Carolina.Moriello@ladydavis.ca
4. Ko Long Choi, MSc: George & Fay Yee Centre for Healthcare Innovation, University of Manitoba, Winnipeg, Canada; ko.choi@umanitoba.ca
5. Colin Dormuth, PhD: Department of Anesthesiology, Pharmacology & Therapeutics, University of British Columbia, British Columbia, Canada; colin.dormuth@ubc.ca
6. Anat Fisher: Department of Anesthesiology, Pharmacology & Therapeutics, University of British Columbia, British Columbia, Canada; anat.fisher@ubc.ca
7. Matt Dahl, BSc: Manitoba Centre for Health Policy, University of Manitoba, Winnipeg, Canada; Matthew.Dahl@umanitoba.ca
8. Fangyun Wu, MSc: ICES, Ontario, Canada; fangyun.wu@ices.on.ca
9. Ayesha Asaf, MPH: ICES, Ontario, Canada; Ayesha.Asaf@ices.on.ca
10. J. Michael Paterson, MSc: ICES, Toronto, Ontario, Canada; michael.paterson@ices.on.ca

\*The Canadian Network for Observational Drug Effect Studies (CNODES) Investigators are: Samy Suissa (Principal Investigator); Colin R. Dormuth (British Columbia); Brenda R. Hemmelgarn (Alberta); Jacqueline Quail (Saskatchewan); Dan Chateau (Manitoba); J. Michael Paterson (Ontario); Jacques LeLorier (Québec); Adrian R. Levy (Atlantic: NS, NL, NB, PEI); Pierre Ernst and Kristian B. Filion (UK Clinical Practice Research Datalink (CPRD)); Lisa Lix (database); Robert W. Platt (Methods); and Ingrid S. Sketris (Knowledge Translation).

1  
2  
3 **Corresponding Author:**

4 Lisa Lix, PhD

5 Department of Community Health Sciences, University of Manitoba

6 S113-750 Bannatyne Avenue

7 Winnipeg, Manitoba, CANADA, R3E 0W3

8 Phone: 204-789-3573

9 E-mail: lisa.lix@umanitoba.ca  
10  
11

12 **Abstract Word Count:** 241

13  
14 **Manuscript Word Count:** 2495

15  
16  
17 **Keywords:** Diagnoses, Administrative Data, Accuracy, International Classification of Diseases  
18  
19

20  
21  
22 **Declaration of Competing Interests:** The authors have no potential conflicts of interest to  
23 disclose.  
24  
25

26  
27 **Funding Statement:** The Canadian Network for Observational Drug Effect Studies (CNODES),  
28 a collaborating centre of the Drug Safety and Effectiveness Network (DSEN), is funded by the  
29 Canadian Institutes of Health Research (CIHR; Grant # DSE-146021). The funders had no role  
30 in the design of the study, analysis, and interpretation of data and in writing of the manuscript.  
31  
32  
33  
34  
35  
36  
37  
38  
39  
40  
41  
42  
43  
44  
45  
46  
47  
48  
49  
50  
51  
52  
53  
54  
55  
56  
57  
58  
59  
60

## Abstract

**Background:** Accurate coding of COVID-19 diagnoses in administrative data benefits population-based studies about the epidemiology, treatment and outcomes of this infectious disease. We describe the validity of COVID-19 diagnoses recorded in hospital discharge abstracts, emergency department (ED) records, and outpatient physician service claims from three Canadian provinces.

**Methods:** Population-based inpatient, ED, and outpatient records were linked to SARS-coV-2 polymerase chain reaction (PCR) test results from British Columbia, Manitoba, and Ontario from April 1, 2020 to March 31, 2021. Sensitivity, specificity, positive predictive value (PPV), and negative predictive value (NPV) of COVID-19 diagnoses were estimated for each quarter in the study period, overall and by province, age group, and sex.

**Results:** Our study encompassed over 19.5 million Canadian residents and 13 million SARS-coV-2 test results. Specificity and NPV of COVID-19 diagnoses were consistently high. Overall sensitivity estimates were 86.2%, 60.4%, and 20.3% in the first quarter for inpatient, ED, and outpatient cohorts and 66.2%, 47.5%, and 25.0% in the last quarter, respectively. For inpatients, overall PPV ranged from 50.0% to 66.4% across quarters. For ED patients, overall PPV estimates were 76.9% and 68.3% in the first and last quarter, respectively. For outpatients the corresponding estimates were 6.8% and 29.1%, although they varied by province.

**Interpretation:** Our multi-province validation study supports the use of inpatient and ED records as an alternative to population-based laboratory data for identification of patients with COVID-19, but does not support the use of outpatient claims for this purpose.

## Introduction

Administrative health data are increasingly being used to examine outcomes, risk factors, and treatments at the population level for individuals diagnosed with COVID-19. However, the validity of COVID-19 diagnosis coding in these data is largely unknown outside of inpatient settings.<sup>1-5</sup> Validity may vary between jurisdictions and over time due to variations in testing protocols and diagnosis coding procedures and staff training; but little is known about such variations.

The Canadian Institute for Health Information (CIHI) published its first guidance on the use of the International Classification of Diseases (ICD), 10<sup>th</sup> revision, Canadian enhancement (i.e., ICD-10-CA) diagnosis codes for COVID-19 patients admitted to Canadian hospitals and emergency departments (ED) in March 2020.<sup>6</sup> Provincial/territorial guidance for diagnosis and fee codes for physician service claims has also been published. For example, Ontario introduced a COVID-19 diagnosis code and fee codes in March 2020 with instructions to use the diagnosis code “when treating patients with suspected or confirmed COVID-19”,<sup>7</sup> while the British Columbia Medical Services Plan published COVID-19 codes for “services directly related to COVID-19”.<sup>8</sup> To our knowledge, only Wu et al.<sup>3</sup> has studied the validity of COVID-19 diagnosis coding in Canadian inpatient and ED records, although their investigation was limited to data from Alberta. The quality of COVID-19 diagnosis coding in outpatient physician service claims has not been studied.

Information regarding the accuracy of COVID-19 diagnoses in administrative data is important to researchers and readers of studies that use these data to understand COVID-19 epidemiology, treatments and outcomes. Our study aimed to assess the validity of COVID-19

1  
2  
3 diagnoses recorded in inpatient hospital discharge abstracts, ED records, and outpatient  
4  
5 physician service claims in three Canadian provinces.  
6

## 7 **Methods**

### 8 *Study Design and Data Sources*

9  
10 We undertook a population-based cohort study using administrative health data and  
11  
12 SARS-CoV-2 polymerase chain reaction (PCR) laboratory test results from British Columbia,  
13  
14 Manitoba and Ontario. The study was conducted by the Canadian Network for Observational  
15  
16 Drug Effect Studies (CNODES),<sup>9</sup> at the request of Health Canada.  
17  
18

19  
20 Four administrative health databases were used in each province: health insurance  
21  
22 registry, physician service claims, ED discharge records, and inpatient hospital discharge  
23  
24 abstracts. All data sources were linked at the individual level using anonymized personal health  
25  
26 insurance numbers. Health insurance registration files capture start and end dates of health  
27  
28 insurance coverage, including the date of loss of coverage due to death or migration;  
29  
30 demographic and residence location information is also captured. Physician service claims  
31  
32 contain information about services provided by specialists and general practitioners; they include  
33  
34 the type of service, fee code, date of service, and at least one diagnosis code associated with the  
35  
36 reason for the service. The latter are recorded using modifications of the 8th (Ontario) and 9th  
37  
38 revisions of ICD (i.e., ICD-8 and ICD-9).<sup>10</sup> We included service claims for all office, phone, and  
39  
40 virtual patient consultations, home visits, and long term care visits. ED discharge records contain  
41  
42 information about visits to hospital-based EDs, including the date of the visit, chief complaint  
43  
44 (i.e., reason for the visit), and diagnoses, which are typically coded using ICD-10-CA. Hospital  
45  
46 discharge abstracts contain diagnostic and procedural information for each acute hospital stay,  
47  
48 including up to 25 diagnoses coded using ICD-10-CA.  
49  
50  
51  
52  
53  
54  
55  
56  
57  
58  
59  
60

1  
2  
3 SARS-CoV-2 laboratory test results were captured from records in the Ontario  
4  
5 Laboratories Information System, the BC Ministry of Health COVID-19 Test Laboratory Data,  
6  
7 and the Manitoba Cadham Provincial COVID-19 Laboratory Testing and Results Database.  
8  
9  
10 Throughout the study period there was publicly-available PCR testing for symptomatic  
11  
12 individuals in all three provinces.  
13

### 14 ***Study Cohorts***

15  
16  
17 We defined inpatient, ED, and outpatient study cohorts comprised of provincial health  
18  
19 insurance registrants with at least one inpatient acute hospital discharge, ED encounter, and  
20  
21 outpatient physician service claim, respectively, between April 1, 2020 and March 31, 2021  
22  
23 (Figure 1). The cohorts were further stratified into three-month (quarterly) sub-groups.  
24

### 25 ***Study Measures***

26  
27  
28 Positive test cases, negative test cases and no-test cases were identified from laboratory  
29  
30 test results in each quarter. A positive test case had at least one positive PCR test with a  
31  
32 specimen collection date within the quarter. A negative test case had at least one negative PCR  
33  
34 test with a specimen collection date and no positive PCR tests within the quarter. No-test cases  
35  
36 had no PCR tests or only indeterminate PCR tests within the quarter.  
37  
38

39  
40 An ICD-10-CA code for laboratory-confirmed COVID-19 (U07.1) in any position was  
41  
42 used to ascertain diagnosed (i.e., positive) cases in hospital discharge abstracts and ED records.  
43  
44 For the inpatient cohort, true positive cases had a specimen collection date for a positive test  
45  
46 between (and including) hospital admission and discharge dates. For the ED cohort, a window of  
47  
48 up to two days before and two days after the specimen collection date for positive test cases was  
49  
50 used to ascertain true positive cases. For the outpatient cohort, COVID-19 coding directives  
51  
52 provided by each provincial ministry of health was used for case ascertainment. The diagnosis  
53  
54  
55  
56  
57  
58  
59  
60

1  
2  
3 codes were 080 (Coronavirus),<sup>7</sup> and 079.82 (COVID-19 Associated Coronavirus),<sup>11</sup> in Ontario  
4  
5 and Manitoba, respectively. In British Columbia, case ascertainment was initially based on  
6  
7 diagnosis code C19 (Services directly related to COVID-19).<sup>8</sup> This diagnosis code was not  
8  
9 associated with any claims during the study period; accordingly, selected fee codes relevant to  
10  
11 COVID-19 (13701, 13702, 13707, and 10008) were used for case ascertainment.<sup>8</sup> For outpatients  
12  
13 who had multiple encounters with the same physician on the same date, only one consultation  
14  
15 was considered. A window of up to two days before and two days after the specimen collection  
16  
17 date for a positive test case was used to ascertain true positive cases in physician service claims.  
18  
19  
20

### 21 *Analyses*

22  
23  
24 Frequencies, percentages, means, and standard deviations (SD) were used to describe the  
25  
26 cohort characteristics (i.e., age, sex, income quintile, rural/urban residence). Validity was  
27  
28 assessed using sensitivity, specificity, positive predictive value (PPV) and negative predictive  
29  
30 value (NPV). All estimates are reported as percentages with 95% confidence intervals (CIs).  
31  
32 Validation measure estimates were produced for each province and for the three provinces  
33  
34 combined, for each cohort and quarter. Analyses were also stratified by sex and age group (<65  
35  
36 years, 65-79 years, 80+ years).  
37  
38  
39

40 To assess the robustness of our findings, we performed four pre-specified sensitivity  
41  
42 analyses. In the first, for the inpatient cohort, true positive cases had a specimen collection date  
43  
44 for a positive test that extended from seven days before the admission date to the discharge date.  
45  
46 In the second, for the inpatient cohort, we used a time window that extended from 14 days before  
47  
48 to 14 days after the hospital admission date to ascertain true positive cases consistent with the  
49  
50 case definition of Kluberg et al.<sup>1,2</sup> In the third and fourth sensitivity analyses, for the ED and  
51  
52  
53  
54  
55  
56  
57  
58  
59  
60

1  
2  
3 outpatient cohorts, respectively, we used a time window that extended from five days before to  
4  
5 five days after the specimen collection date for a positive test to identify true positive cases.  
6  
7

## 8 **Results**

9  
10 After applying the study entry criteria, the study cohorts were comprised of  
11  
12 approximately 1.3 million inpatients, 3.2 million ED patients, and 15.1 million outpatients  
13  
14 (Figure 1). Ontario residents comprised 51.2%, 77.9%, and 67.3% of the inpatient, ED, and  
15  
16 outpatient cohorts, respectively. The average age was 55.9 years for the inpatient cohort, 43.3  
17  
18 years for the ED cohort and 44.4 years for the outpatient cohort (Table 1; Tables S1-S3 contain  
19  
20 province-specific results). Females comprised 57.2% of the inpatient cohort, 52.1% of the ED  
21  
22 cohort, and 54.2% of the outpatient cohort. The outpatient cohort had a lower percentage of  
23  
24 individuals in the lowest income quintile than the ED and inpatient cohorts. All cohorts were  
25  
26 comprised primarily of urban residents, as expected.  
27  
28  
29

30  
31 Figures 2 to 4 contain overall estimates of sensitivity, specificity, PPV, and NPV for the  
32  
33 inpatient, ED, and outpatient cohorts, respectively, by quarter. Province-specific estimates are  
34  
35 reported in Tables 2 to 4; case frequencies to produce these estimates are in Tables S4 to S6.  
36  
37 Specificity and NPV estimates were consistently high across all cohorts and quarters and  
38  
39 frequently exceeded 95%. Sensitivity and PPV estimates varied by cohort, quarter, and province.  
40  
41

42 For the inpatient cohort, overall sensitivity was 86.2% (95% CI: 84.2, 88.1) in the first  
43  
44 quarter (i.e., Q1); it dropped to 66.2% (95% CI: 64.7, 67.6) in the last quarter (i.e., Q4). Overall  
45  
46 PPV was 66.4% (95% CI: 64.5, 68.4) in Q1 and 66.3% (95% CI: 65.0, 67.6) in Q4. The lowest  
47  
48 overall PPV was 50.0% (95% CI: 46.8, 53.2) in Q2. Province-specific PPV for Q1 ranged from  
49  
50 30.0% (95% CI: 26.9, 33.0) in British Columbia to 75.0% (95% CI: 73.6, 76.4) in Ontario. In  
51  
52  
53  
54  
55  
56  
57  
58  
59  
60



1  
2  
3 British Columbia, PPV was low in Q1 and Q2, then increased in Q3 and Q4, while in Ontario,  
4  
5 PPV dropped in Q3 and Q4 when compared to Q2.  
6

7  
8 For the ED cohort, overall sensitivity were 60.4% (95% CI: 58.3, 62.5) in Q1 and 47.5%  
9  
10 (95% CI: 46.5, 48.6) in Q4. PPV was 76.9% (95% CI: 75.0, 78.8) and 68.3% (95% CI: 67.2,  
11  
12 69.4) in Q1 and Q4, respectively. Sensitivity was poor for Manitoba throughout the study period,  
13  
14 with a maximum estimate of 11.6% (95% CI: 9.5, 13.6) in Q4; PPV was 39.9% (95% CI: 34.1,  
15  
16 45.7) in Q4. In comparison, maximum sensitivity for Ontario was 61.0% (95% CI: 59.7, 62.2) in  
17  
18 Q1; PPV in this quarter was 77.0 (95% CI: 75.8, 78.2).  
19  
20

21  
22 For the outpatient cohort, overall sensitivity was 20.3% (95% CI: 19.4, 21.3) in Q1 and  
23  
24 25.0% (95% CI: 24.6, 25.4) in Q4. Overall PPV was 6.8% (95% CI: 6.5, 7.1) in Q1 and 29.1%  
25  
26 (95% CI: 28.7, 29.5) in Q4. Sensitivity improved over time in both Manitoba and Ontario but  
27  
28 was low, increasing from 1.3% (95% CI: 0.0, 3.8) and 21.1% (95% CI: 20.6, 21.7), respectively,  
29  
30 in Q1, to 6.3% (95% CI: 5.5, 7.2) and 35.6% (95% CI: 35.3, 35.9), respectively, in Q4. In British  
31  
32 Columbia, sensitivity declined over time, falling from 10.2% (95% CI: 8.6, 11.8) in Q1 to 2.5%  
33  
34 (95% CI: 2.3, 2.6) in Q4; PPV increased slightly from 1.0% (95% CI: 0.9, 1.2) in Q1 to 12.9%  
35  
36 (95% CI: 12.2, 13.7) in Q4.  
37  
38

39  
40 Overall sensitivity and PPV generally increased across age groups in the inpatient cohort,  
41  
42 but declined across age groups in the ED and outpatient cohorts (Tables S7-S9). No consistent  
43  
44 pattern was observed for sex in overall sensitivity and PPV estimates (Tables S7-S9).  
45  
46

47 For the pre-defined sensitivity analyses for the inpatient cohort (Tables S10-S11),  
48  
49 expanding the duration of the case ascertainment window led to absolute increases in estimated  
50  
51 sensitivity of up to 46%, with the largest increase in British Columbia. However, in Manitoba  
52  
53 sensitivity was lower in Q1 and Q2 for the sensitivity analysis than for the primary analysis.  
54  
55  
56  
57

1  
2  
3 Overall, the first sensitivity analysis resulted in greater improvements in estimates of sensitivity  
4 and PPV than the second; temporal trends in both measures were similar to those observed in the  
5 primary analysis. For the third sensitivity analysis (i.e., ED cohort; Table S12), expanding the  
6 duration of the case ascertainment window resulted in absolute increases of up to 10% in  
7 sensitivity. Increases in PPV were smaller. For the outpatient cohort, expanding the case  
8 ascertainment window led to absolute increases in sensitivity and PPV of up to 18%, although  
9 the differences were generally smaller (i.e., less than 5%) for most provinces and quarters (Table  
10 S13).  
11  
12  
13  
14  
15  
16  
17  
18  
19  
20

## 21 **Interpretation**

22  
23 Our multi-province study of the accuracy of COVID-19 diagnoses in inpatient, ED and  
24 outpatient records occurred during the first year of the pandemic when SARS-CoV-2 PCR  
25 testing was broadly promoted and openly accessible to symptomatic individuals in all three study  
26 provinces.<sup>6</sup> We found the accuracy of diagnosis coding for COVID-19 was generally good for  
27 inpatient records, moderate for ED records, and poor for outpatient physician encounters, but it  
28 varied by province and over time. Generally, sensitivity estimated declined over time and,  
29 depending on the province, PPV estimated either improved or remained stable. Expanding the  
30 duration of the observation window for ascertaining COVID-19 diagnoses in healthcare records  
31 improved sensitivity and PPV estimates, especially for inpatient data, but the effect for outpatient  
32 data was generally small.  
33  
34  
35  
36  
37  
38  
39  
40  
41  
42  
43  
44  
45

46  
47 Our findings for inpatient diagnosis coding are generally consistent with those reported in  
48 prior studies.<sup>1-5</sup> For example, using US inpatient data from May to October 2020, Kluberg et  
49 al.<sup>1,2</sup> reported sensitivity estimates of 95% and PPV of 81% for ICD-10 U07.1. Similarly, Kadri  
50 et al.<sup>4</sup> reported sensitivity estimates of 98% and PPV of 92% from April to May 2020. These  
51  
52  
53  
54  
55  
56  
57  
58  
59  
60

1  
2  
3 results suggest that during the first year of the pandemic, hospitals were coding COVID-19  
4 diagnoses with moderate to good accuracy. However, given the low and declining sensitivities,  
5 epidemiological studies relying on discharge abstracts are likely to underestimate the true burden  
6 of disease in hospital.  
7  
8  
9  
10  
11

12 Our study is among the first to report the accuracy of COVID-19 diagnosis coding in ED  
13 records and outpatient physician claims. For the former, performance was noticeably poorer in  
14 Manitoba than in the other provinces, particularly for sensitivity. This may be because of  
15 differences in data sources; Manitoba does not use the National Ambulatory Care Reporting  
16 System for ED records and has fewer fields for diagnosis codes than Ontario and British  
17 Columbia. The accuracy of COVID-19 diagnosis coding in outpatient claims was poor in all  
18 provinces. Expanding the case ascertainment window resulted in only small improvements in  
19 sensitivity and PPV estimates. Our findings for outpatient data may be attributed to limited  
20 access to family physicians particularly during the early months of the pandemic, the multiple  
21 reasons a person may consult their physician regarding COVID-19, testing-related visits were  
22 likely to directed preferentially to hospital- or community-based mass testing clinics rather than  
23 doctors' offices, and the time it takes physicians and billing clerks to become accustomed to  
24 using new diagnosis or fee codes. Our findings do not support use of physician service claims as  
25 a substitute for population-based lab data to identify patients with COVID-19.  
26  
27  
28  
29  
30  
31  
32  
33  
34  
35  
36  
37  
38  
39  
40  
41  
42  
43

44 Strengths of our study include assessment of coding accuracy in both inpatient and  
45 outpatient settings, during multiple time periods, and in three Canadian provinces. Our access to  
46 population-wide, community-based PCR laboratory test results made validation possible outside  
47 of inpatient hospital settings. Study limitations also merit emphasis. First, the generalizability of  
48 our findings, particularly for outpatient physician service claims, is unknown. Each province  
49  
50  
51  
52  
53  
54  
55  
56  
57  
58  
59  
60

1  
2  
3 implemented its own COVID-19 coding for outpatient claims, with varying directions. Further,  
4 SARS-CoV-2 PCR laboratory testing was openly and widely accessible to symptomatic patients  
5  
6 throughout the study period. However, broad access to the results of these PCR tests also would  
7  
8 be expected to influence diagnosis coding behaviour and completeness. Our findings may not  
9  
10 generalize to jurisdictions where SARS-CoV-2 PCR testing policies and practice differed from  
11  
12 those in Canada, although many countries appear to have implemented similar testing policies.<sup>12</sup>  
13  
14 Finally, given that diagnosis coding validity changed over time, our findings may not generalize  
15  
16 beyond the study period.  
17  
18  
19  
20

21 In summary, we identified variation in the validity of COVID-19 diagnoses recorded in  
22  
23 different healthcare settings, geographic areas, and over time, but the overall accuracy of  
24  
25 diagnosis codes for COVID-19 case ascertainment were generally good for inpatient records,  
26  
27 moderate for ED records, and poor for outpatient records. This study provides valuable insights  
28  
29 about the validity of these data sources for COVID-19 case ascertainment that will benefit  
30  
31 population-based research and surveillance.  
32  
33  
34  
35  
36  
37  
38  
39  
40  
41  
42  
43  
44  
45  
46  
47  
48  
49  
50  
51  
52  
53  
54  
55  
56  
57  
58  
59  
60

## ACKNOWLEDGEMENTS

This study was made possible through data-sharing agreements between the CNODES member research centres and the respective provincial governments of British Columbia, Manitoba (HIPC No. 2020/2021 - 53), and Ontario.

The BC Ministry of Health approved access to and use of BC data facilitated by Population Data BC, for this study. All inferences, opinions, and conclusions drawn in this manuscript are those of the authors, and do not reflect the opinions or policies of the Data Stewards. British Columbia data sources were as follows (<https://www2.gov.bc.ca/gov/content/health/conducting-health-research-evaluation/data-access-health-data-central>): British Columbia Ministry of Health [creator] (2022): Medical Services Plan (MSP) Payment Information File. BC Ministry of Health [publisher]. MOH (2022); Canadian Institute for Health Information [creator] (2022): National Ambulatory Care Reporting System. BC Ministry of Health [publisher]. MOH (2022); Canadian Institute for Health Information [creator] (2022): Discharge Abstract Database (Hospital Separations). BC Ministry of Health [publisher]. MOH (2022); British Columbia Ministry of Health [creator] (2022): Consolidation File (MSP Registration & Premium Billing). BC Ministry of Health [publisher]. MOH (2022). Parts of this material are based on data and/or information compiled and provided by the Canadian Institute for Health Information (CIHI). This study was supported by ICES, which is funded in part by an annual grant from the Ontario Ministry of Health. The authors also acknowledge the Manitoba Centre for Health Policy for use of data contained in the Manitoba Population Research Data Repository under project #2022-004 (HIPC# 2021/2022-25). Data used in this study are from the Manitoba Population Research Data Repository housed at the Manitoba Centre for Health Policy, University of Manitoba and were derived from data provided by Manitoba Health.

The opinions, results, and conclusions are those of the authors. No endorsement by the provincial governments, data stewards, CIHI, Health Canada or CIHR is intended or should be inferred.

**REFERENCES**

1. Klumberg S. Validation of claims-based algorithms to identify hospitalized COVID-19 events within the FDA Sentinel System. International Conference on Pharmacoepidemiology COVID-19 Special Session; December 3, 2020.
2. Klumberg SA, Hou L, Dutcher SK, Billings M, Kit B, Toh S, Dublin S, Haynes K, Kline A, Maiyani M, Pawloski PA, Watson ES, Cocoros NM. Validation of diagnosis codes to identify hospitalized COVID-19 patients in health care claims data. *Pharmacoepidemiol Drug Saf.* 2022;31(4):476-480. doi: 10.1002/pds.5401.
3. Wu G, D'Souza AG, Quan H, Southern DA, Youngson E, Williamson T, Eastwood C, Xu Y. Validity of ICD-10 codes for COVID-19 patients with hospital admissions or ED visits in Canada: a retrospective cohort study. *BMJ Open.* 2022;12(1):e057838. doi: 10.1136/bmjopen-2021-057838.
4. Kadri SS, Gundrum J, Warner S, Cao Z, Babiker A, Klompas M, Rosenthal N. Uptake and accuracy of the diagnosis code for COVID-19 among US hospitalizations. *JAMA.* 2020; 324(24):2553-2554. doi: 10.1001/jama.2020.20323.
5. Bhatt AS, McElrath EE, Claggett BL, Bhatt DL, Adler DS, Solomon SD, Vaduganathan M. Accuracy of ICD-10 diagnostic codes to identify COVID-19 among hospitalized patients. *J Gen Intern Med.* 2021;36(8):2532-2535. doi: 10.1007/s11606-021-06936-w.
6. Canadian Institute for Health Information (CIHI). ICD-10-CA coding direction for suspected COVID-19 cases. Ottawa: CIHI [cited June 16, 2022]. Available from: <https://www.cihi.ca/sites/default/files/document/covid-19-presentation-en.pdf>.
7. Ontario Health Insurance Plan. Bulletin Number 4755, COVID-19 temporary fee schedule codes implemented-physicians can begin to submit claims for COVID-19 on May 1, 2020. Toronto: Ontario Ministry of Health and Long-Term Care [cited June 1, 2022]. Available from: <https://www.health.gov.on.ca/en/pro/programs/ohip/bulletins/4000/bul4755.aspx>.
8. Doctors of British Columbia. Billing changes – COVID-19 [cited June 16, 2022]. Available from: [https://divisionsbc.ca/sites/default/files/54972/Virtual%20Telehealth%20Reference%20Guide%20-%20billing\\_0.pdf](https://divisionsbc.ca/sites/default/files/54972/Virtual%20Telehealth%20Reference%20Guide%20-%20billing_0.pdf).
9. Suissa S, Henry D, Caetano P, Dormuth CR, Ernst P, Hemmelgarn B, Leloir J, Levy A, Martens PJ, Paterson JM, Platt RW, Sketris I, Teare G. CNODES: the Canadian Network for Observational Drug Effect Studies. *Open Med.* 2012;6(4):e134-40.
10. Lix LM, Walker R, Quan H, Nesdole R, Yang J, Chen G; CHEP-ORTF Hypertension Outcomes and Surveillance Team. Features of physician services databases in Canada. *Chronic Dis Inj Can.* 2012;32(4):186-93.
11. Manitoba Government. Claims processing solution (CPS) 2021 [cited June 16, 2022]. Available from: <https://www.gov.mb.ca/health/claims/index.html>.
12. Hale T, Angrist N, Goldszmidt R, Kira B, Petherick A, Phillips T, Webster S, Cameron-Blake E, Hallas L, Majumdar S, Tatlow H. A global panel database of pandemic policies (Oxford COVID-19 government response tracker). *Nat Hum Behav.* 2021;5(4):529-538. doi: 10.1038/s41562-021-01079-8.

Figure 1. Flow diagram for construction of study cohorts

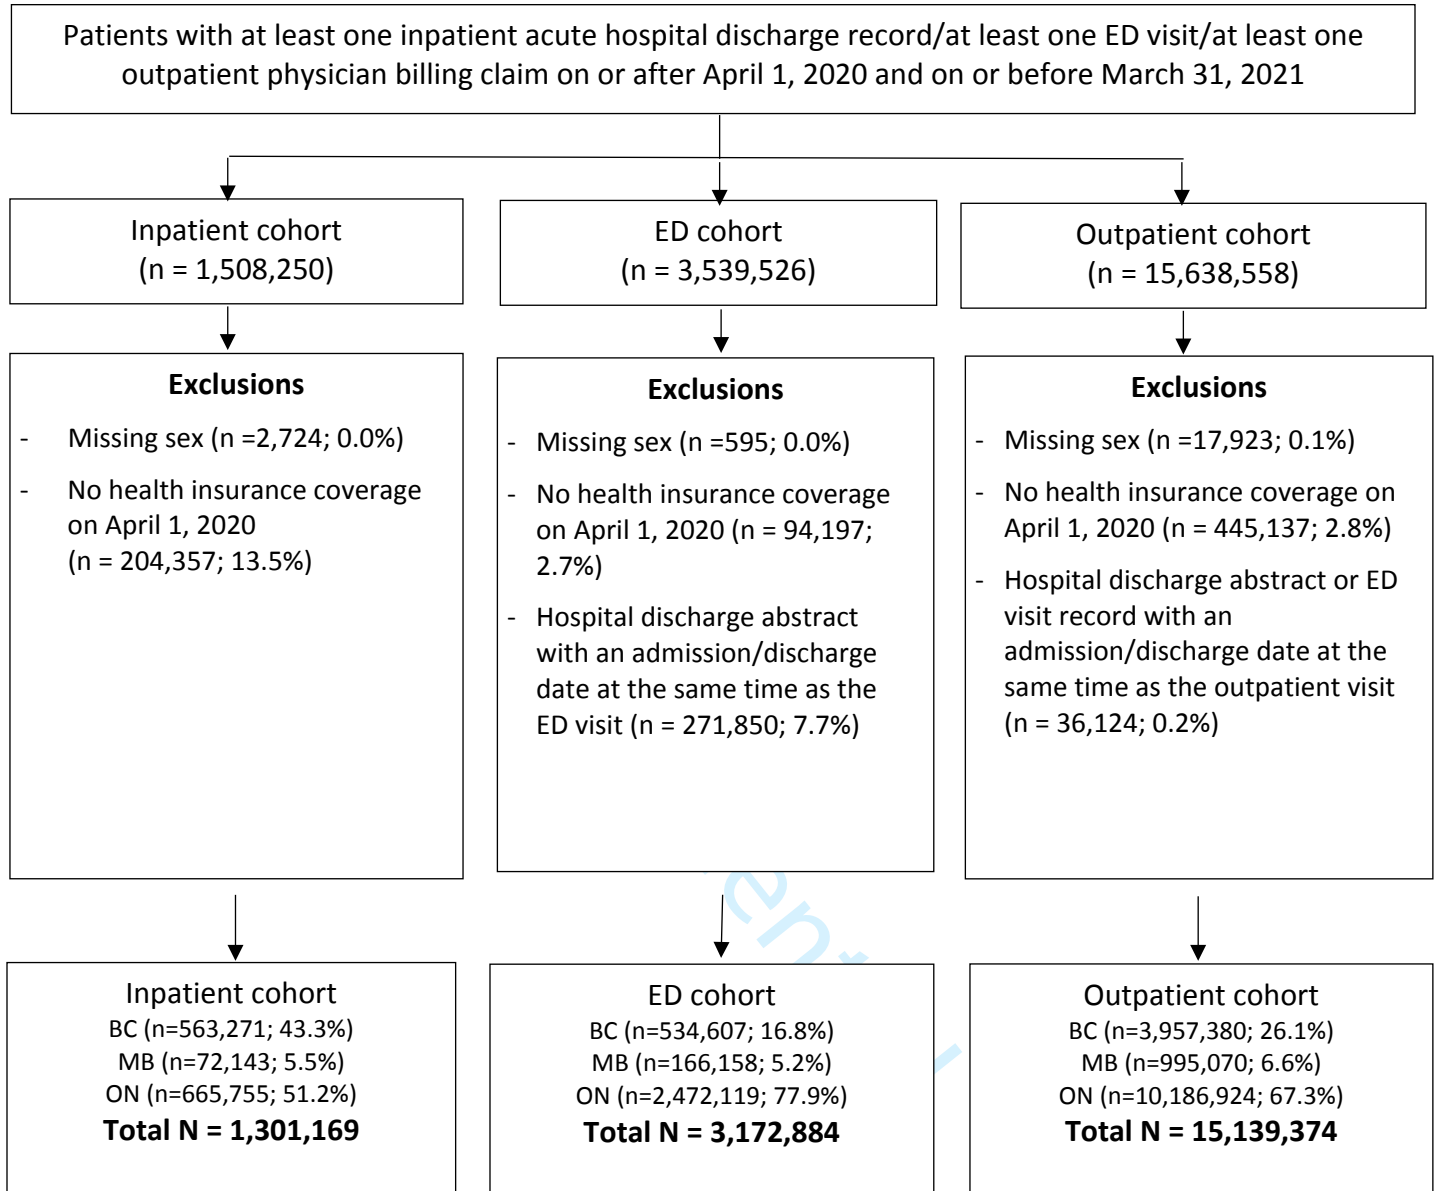

**Abbreviations:** ED: emergency department; BC: British Columbia; MB: Manitoba; ON: Ontario

**Figure 2. Overall validation estimates by quarter (Q): inpatient cohort**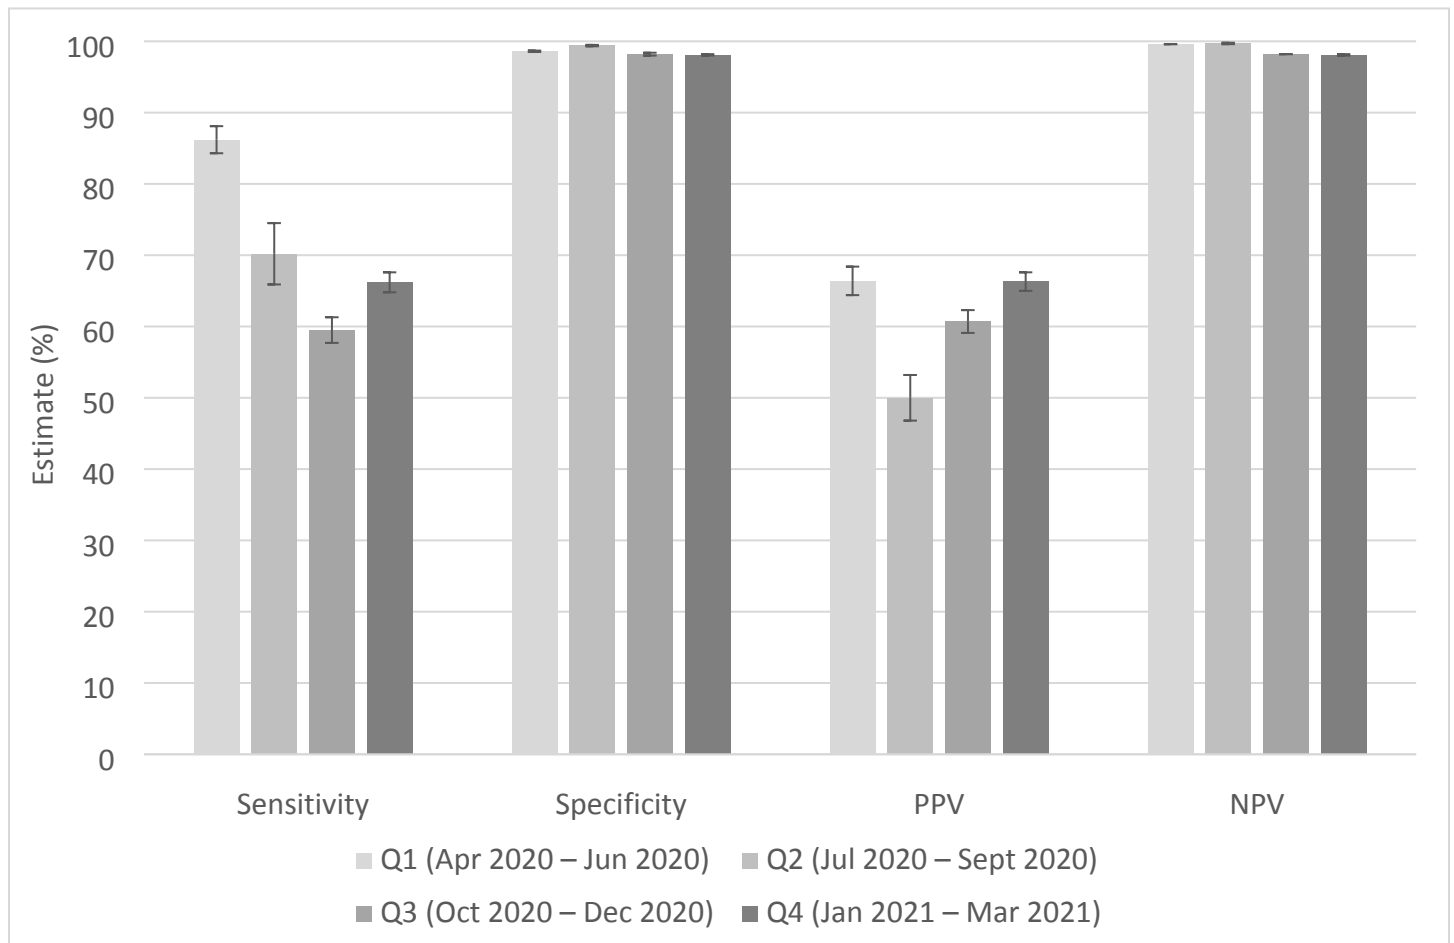

**Abbreviations:** PPV: Positive predictive value; NPV: Negative predictive value



Figure 3. Overall validation estimates by quarter (Q): Emergency department (ED) cohort

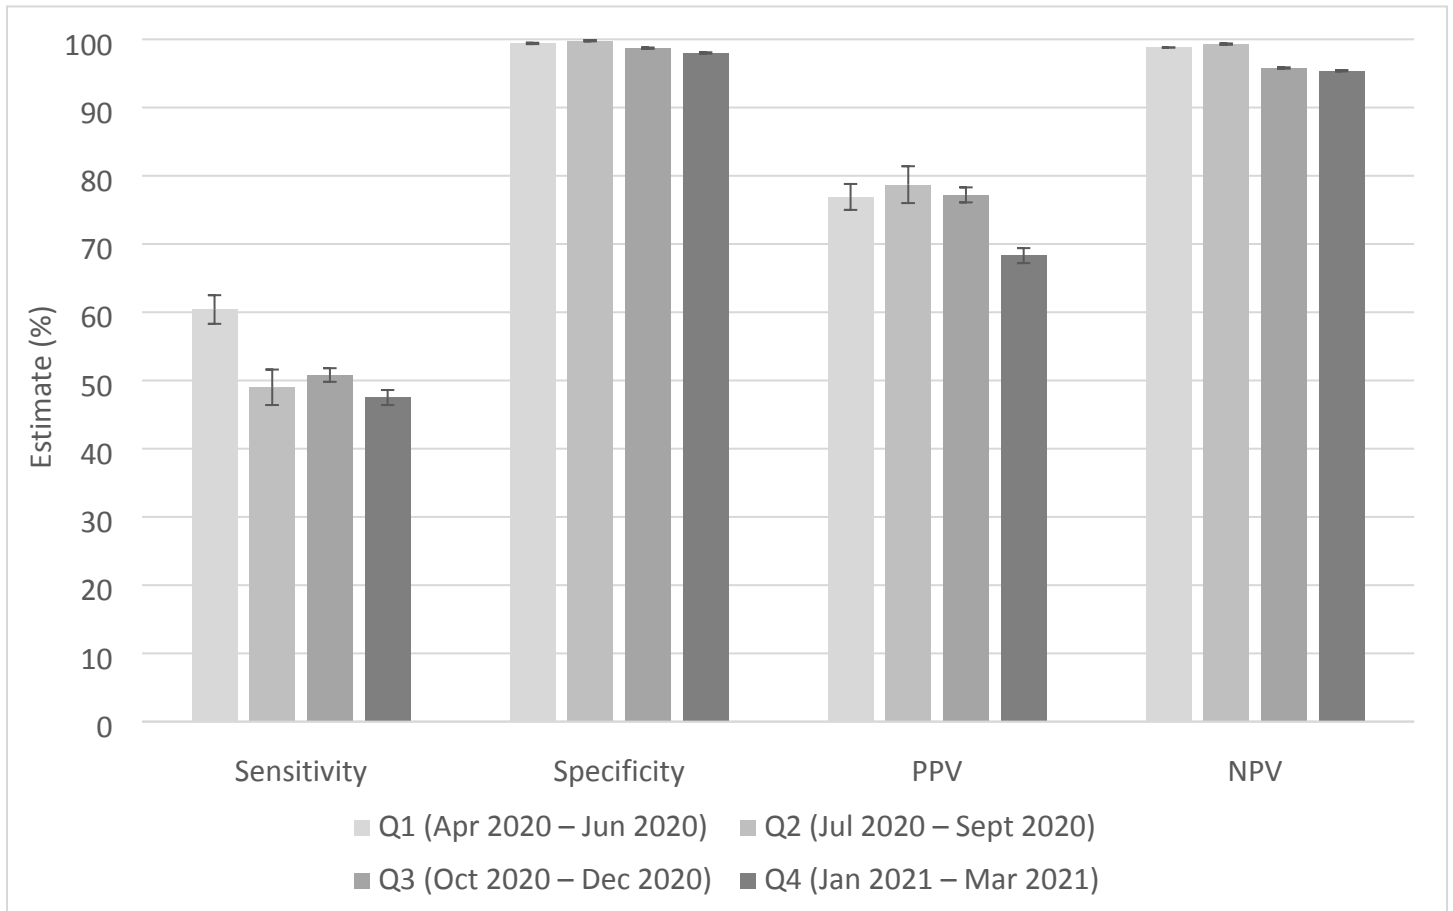

**Abbreviations:** PPV: Positive predictive value; NPV: Negative predictive value

**Figure 4. Overall validation estimates by quarter (Q): outpatient cohort**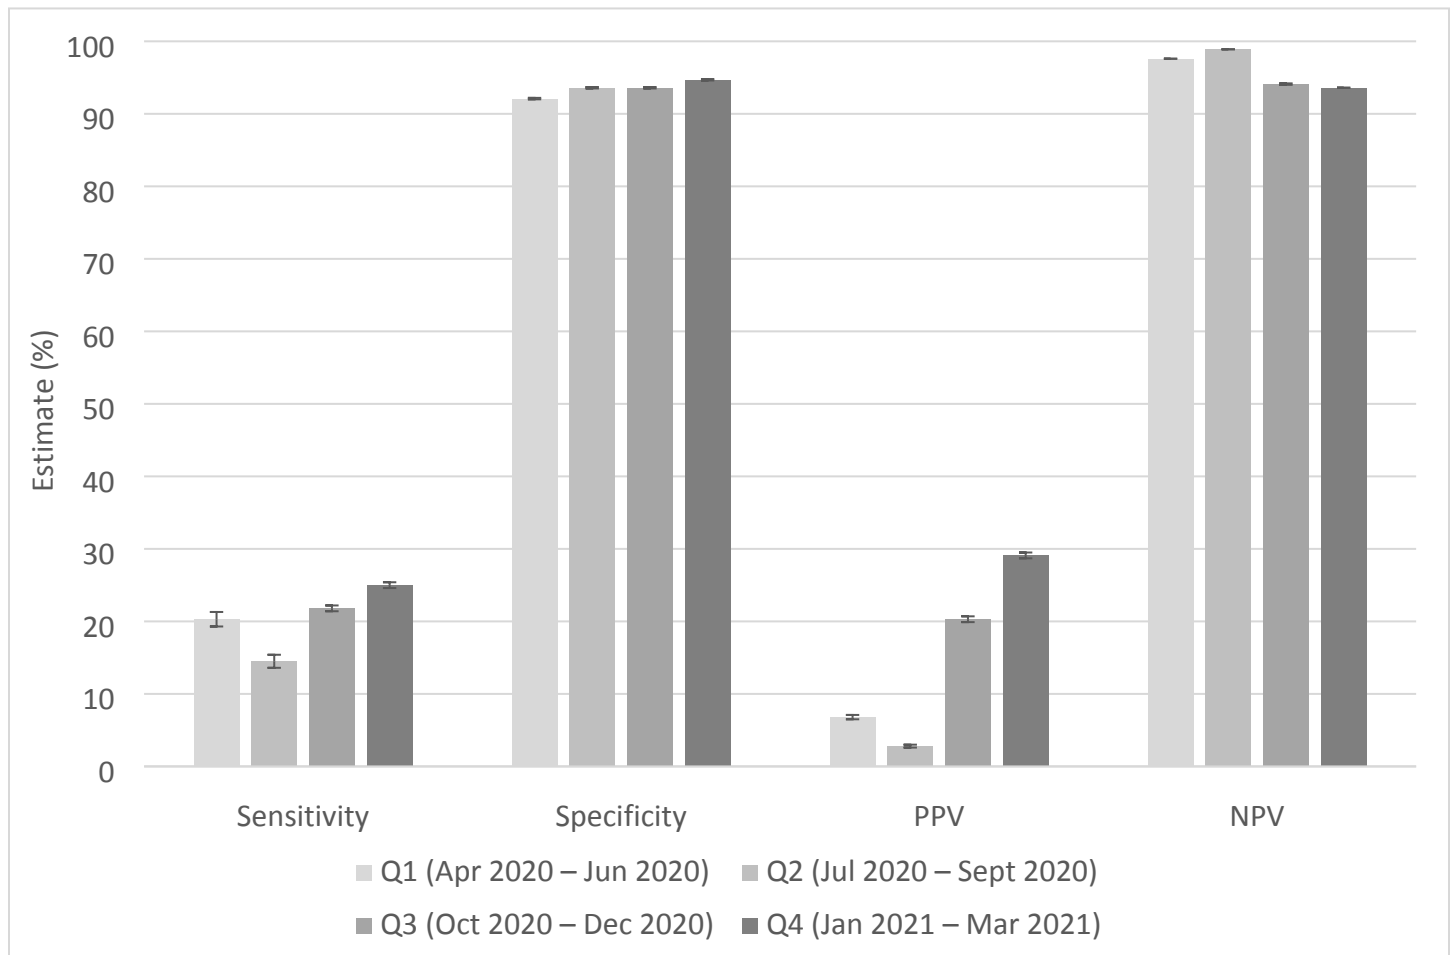

**Abbreviations:** PPV: Positive predictive value; NPV: Negative predictive value

**Table 1. Characteristics of inpatient, emergency department (ED), and outpatient cohorts**

| Characteristic                  | Inpatient        | ED               | Outpatient        |
|---------------------------------|------------------|------------------|-------------------|
| <b>Patients, N</b>              | 1,301,169        | 3,172,884        | 15,139,374        |
| <b>Age, years</b>               |                  |                  |                   |
| Mean (SD)                       | 55.9 (22.3)      | 43.3 (23.5)      | 44.4 (23.3)       |
| <65, n (%)                      | 752,901 (57.9)   | 2,496,872 (78.7) | 11,752,789 (77.6) |
| 65-79, n (%)                    | 352,603 (27.1)   | 464,006 (14.6)   | 2,506,922 (16.6)  |
| 80+, n (%)                      | 195,665 (15.0)   | 212,006 (6.7)    | 879,663 (5.8)     |
| <b>Sex, n (%)</b>               |                  |                  |                   |
| Males                           | 556,729 (42.8)   | 1,521,172 (47.9) | 6,926,694 (45.8)  |
| Females                         | 744,440 (57.2)   | 1,651,712 (52.1) | 8,212,680 (54.2)  |
| <b>Income quintile, n (%)</b>   |                  |                  |                   |
| 1st (Lowest)                    | 246,685 (19.0)   | 639,404 (20.1)   | 2,463,368 (16.3)  |
| 2nd                             | 197,114 (15.2)   | 559,575 (17.6)   | 2,370,653 (15.7)  |
| 3rd                             | 186,366 (14.3)   | 549,125 (17.3)   | 2,460,442 (16.3)  |
| 4th                             | 181,575 (13.9)   | 540,065 (17.0)   | 2,523,160 (16.7)  |
| 5th (Highest)                   | 253,689 (19.5)   | 570,187 (17.9)   | 3,043,805 (20.1)  |
| Missing                         | 235,740 (18.1)   | 314,528 (9.9)    | 2,277,946 (15.1)  |
| <b>Area of residence, n (%)</b> |                  |                  |                   |
| Rural                           | 184,737 (14.2)   | 442,454 (13.9)   | 1,690,020 (11.2)  |
| Urban                           | 1,113,889 (85.6) | 2,721,432 (85.8) | 13,412,772 (88.6) |
| Missing                         | 2,543 (0.2)      | 8,998 (0.3)      | 36,582 (0.2)      |

**Abbreviation:** SD: standard deviation

1  
2  
3  
4  
5  
6  
7  
8  
9  
10  
11  
12  
13  
14  
15  
16  
17  
18  
19  
20  
21  
22  
23  
24  
25  
26  
27  
28  
29  
30  
31  
32  
33  
34  
35  
36  
37  
38  
39  
40  
41  
42  
43  
44  
45  
46  
47

**Table 2. Validation estimates (95% confidence intervals) by province and quarter (Q): inpatient cohort**

| <b>Measure</b>          | <b>Q1<br/>Apr 2020 – Jun 2020</b> | <b>Q2<br/>Jul 2020 – Sept 2020</b> | <b>Q3<br/>Oct 2020 – Dec 2020</b> | <b>Q4<br/>Jan 2021 – Mar 2021</b> |
|-------------------------|-----------------------------------|------------------------------------|-----------------------------------|-----------------------------------|
| <b>British Columbia</b> |                                   |                                    |                                   |                                   |
| <b>Sensitivity</b>      | 88.4 (84.8, 92.1)                 | 56.1 (49.8, 62.4)                  | 52.0 (49.7, 54.3)                 | 53.5 (51.6, 55.4)                 |
| <b>Specificity</b>      | 97.5 (97.3, 97.7)                 | 97.7 (97.5, 97.8)                  | 97.5 (97.4, 97.7)                 | 98.3 (98.2, 98.5)                 |
| <b>PPV</b>              | 30.0 (26.9, 33.0)                 | 17.8 (15.1, 20.6)                  | 46.9 (44.8, 49.1)                 | 58.9 (57.0, 60.9)                 |
| <b>NPV</b>              | 99.9 (99.8, 99.9)                 | 99.6 (99.5, 99.7)                  | 98.0 (97.8, 98.1)                 | 97.9 (97.8, 98.1)                 |
| <b>Manitoba</b>         |                                   |                                    |                                   |                                   |
| <b>Sensitivity</b>      | 88.9 (77.0, 100.0)                | 75.4 (67.5, 83.3)                  | 59.1 (56.4, 61.8)                 | 48.2 (44.1, 52.3)                 |
| <b>Specificity</b>      | 99.6 (99.4, 99.7)                 | 99.3 (99.1, 99.5)                  | 95.3 (94.9, 95.6)                 | 98.5 (98.3, 98.7)                 |
| <b>PPV</b>              | 46.2 (32.6, 59.7)                 | 60.6 (52.5, 68.6)                  | 55.4 (52.7, 58.0)                 | 53.6 (49.4, 57.9)                 |
| <b>NPV</b>              | 99.9 (99.9, 100.0)                | 99.6 (99.5, 99.8)                  | 95.9 (95.5, 96.2)                 | 98.1 (97.9, 98.3)                 |
| <b>Ontario</b>          |                                   |                                    |                                   |                                   |
| <b>Sensitivity</b>      | 86.0 (84.8, 87.1)                 | 73.0 (70.2, 75.8)                  | 62.3 (61.0, 63.6)                 | 71.0 (70.1, 72.0)                 |
| <b>Specificity</b>      | 98.8 (98.8, 98.9)                 | 99.8 (99.8, 99.8)                  | 98.8 (98.8, 98.9)                 | 98.0 (97.9, 98.1)                 |
| <b>PPV</b>              | 75.0 (73.6, 76.4)                 | 73.6 (70.9, 76.4)                  | 68.3 (66.9, 69.6)                 | 68.9 (67.9, 69.8)                 |
| <b>NPV</b>              | 99.4 (99.4, 99.5)                 | 99.8 (99.7, 99.8)                  | 98.5 (98.4, 98.5)                 | 98.2 (98.1, 98.3)                 |

**Abbreviations:** PPV: Positive predictive value; NPV: Negative predictive value

**Table 3. Validation estimates (95% confidence intervals) by province and quarter (Q): Emergency Department (ED) cohort**

| Measure                 | Q1                   | Q2                   | Q3                  | Q4                  |
|-------------------------|----------------------|----------------------|---------------------|---------------------|
|                         | Apr 2020 – Jun 2020  | Jul 2020 – Sept 2020 | Oct 2020 – Dec 2020 | Jan 2021 – Mar 2021 |
| <b>British Columbia</b> |                      |                      |                     |                     |
| <b>Sensitivity</b>      | 52.4 (46.4, 58.4)    | 44.3 (40.8, 47.9)    | 31.8 (30.3, 33.2)   | 28.7 (27.2, 30.2)   |
| <b>Specificity</b>      | 99.8 (99.8, 99.9)    | 99.7 (99.7, 99.8)    | 98.2 (98.1, 98.3)   | 98.1 (98.0, 98.3)   |
| <b>PPV</b>              | 79.1 (73.1, 85.1)    | 80.0 (76.2, 83.8)    | 61.4 (59.2, 63.6)   | 58.1 (55.8, 60.4)   |
| <b>NPV</b>              | 99.4 (99.3, 99.5)    | 98.6 (98.4, 98.7)    | 94.0 (93.8, 94.3)   | 93.8 (93.6, 94.1)   |
| <b>Manitoba</b>         |                      |                      |                     |                     |
| <b>Sensitivity</b>      | 0.09 (0.0, 0.2)      | 2.6 (0.0, 5.18)      | 9.9 (8.6, 11.1)     | 11.6 (9.5, 13.6)    |
| <b>Specificity</b>      | 100.0 (100.0, 100.0) | 99.8 (99.7, 99.9)    | 97.3 (97.0, 97.5)   | 98.9 (98.7, 99.0)   |
| <b>PPV</b>              | 1.00 (1.0, 1.0)      | 12.1 (1.0, 23.3)     | 34.2 (30.6, 37.9)   | 39.9 (34.1, 45.7)   |
| <b>NPV</b>              | 0.19 (0.1, 0.3)      | 98.9 (98.7, 99.1)    | 88.3 (87.8, 88.8)   | 94.6 (94.2, 94.9)   |
| <b>Ontario</b>          |                      |                      |                     |                     |
| <b>Sensitivity</b>      | 61.0 (59.7, 62.2)    | 52.3 (50.6, 54.1)    | 59.0 (58.4, 59.7)   | 52.3 (51.6, 53.0)   |
| <b>Specificity</b>      | 99.4 (99.3, 99.4)    | 99.8 (99.8, 99.9)    | 98.9 (98.8, 98.9)   | 97.9 (97.9, 98.0)   |
| <b>PPV</b>              | 77.0 (75.8, 78.2)    | 79.6 (77.8, 81.3)    | 81.3 (80.7, 82.0)   | 70.0 (69.2, 70.7)   |
| <b>NPV</b>              | 98.6 (98.6, 98.7)    | 99.4 (99.4, 99.5)    | 96.6 (95.6, 96.7)   | 95.7 (95.6, 95.8)   |

**Abbreviations:** PPV: Positive predictive value; NPV: Negative predictive value

1  
2  
3  
4  
5  
6  
7  
8  
9  
10  
11  
12  
13  
14  
15  
16  
17  
18  
19  
20  
21  
22  
23  
24  
25  
26  
27  
28  
29  
30  
31  
32  
33  
34  
35  
36  
37  
38  
39  
40  
41  
42  
43  
44  
45  
46  
47

**Table 4. Validation estimates (95% confidence intervals) by province and quarter (Q): outpatient cohort**

| Measure                 | Q1<br>Apr 2020 – Jun 2020 | Q2<br>Jul 2020 – Sept 2020 | Q3<br>Oct 2020 – Dec 2020 | Q4<br>Jan 2021 – Mar 2021 |
|-------------------------|---------------------------|----------------------------|---------------------------|---------------------------|
| <b>British Columbia</b> |                           |                            |                           |                           |
| <b>Sensitivity</b>      | 10.2 (8.6, 11.8)          | 6.1 (5.4, 6.7)             | 2.4 (2.2, 2.5)            | 2.5 (2.3, 2.6)            |
| <b>Specificity</b>      | 88.5 (88.3, 88.7)         | 91.7 (91.6, 91.8)          | 96.9 (96.8, 96.9)         | 98.2 (98.2, 98.3)         |
| <b>PPV</b>              | 1.0 (0.9, 1.2)            | 1.5 (1.4, 1.7)             | 5.6 (5.2, 5.9)            | 12.9 (12.2, 13.7)         |
| <b>NPV</b>              | 98.8 (98.8, 98.9)         | 97.9 (97.8, 97.9)          | 92.7 (92.6, 92.7)         | 90.5 (90.4, 90.6)         |
| <b>Manitoba</b>         |                           |                            |                           |                           |
| <b>Sensitivity</b>      | 1.3 (0, 3.8)              | 1.7 (0.84, 2.5)            | 5.0 (4.5, 5.4)            | 6.3 (5.5, 7.2)            |
| <b>Specificity</b>      | 99.5 (99.4, 99.5)         | 99.7 (99.7, 99.8)          | 96.7 (96.5, 96.8)         | 95.2 (95.0, 95.3)         |
| <b>PPV</b>              | 0.6 (0, 1.7)              | 8.3 (4.3, 12.4)            | 14.0 (12.8, 15.1)         | 5.7 (5.0, 6.5)            |
| <b>NPV</b>              | 99.8 (99.7, 99.8)         | 98.7 (98.6, 98.7)          | 90.3 (90.1, 90.4)         | 95.6 (95.5, 95.8)         |
| <b>Ontario</b>          |                           |                            |                           |                           |
| <b>Sensitivity</b>      | 21.1 (20.6, 21.7)         | 20.1 (19.3, 20.9)          | 33.0 (32.7, 33.3)         | 35.6 (35.3, 35.9)         |
| <b>Specificity</b>      | 92.5 (92.4, 92.5)         | 93.7 (93.7, 93.8)          | 92.0 (92.0, 92.1)         | 93.5 (93.4, 93.5)         |
| <b>PPV</b>              | 8.5 (8.2, 8.7)            | 3.2 (3.1, 3.3)             | 22.5 (22.2, 22.7)         | 31.1 (30.8, 31.4)         |
| <b>NPV</b>              | 97.3 (97.2, 97.3)         | 99.1 (99.1, 99.2)          | 95.2 (95.1, 95.2)         | 94.6 (94.6, 94.6)         |

**Abbreviations:** PPV: Positive predictive value; NPV: Negative predictive value

## Supplementary Material

Table S1. Characteristics of inpatient cohort by province

| Characteristic                  | British Columbia | Manitoba      | Ontario        |
|---------------------------------|------------------|---------------|----------------|
| <b>Patients, N</b>              | 563,271          | 72,143        | 665,755        |
| <b>Age, years</b>               |                  |               |                |
| Mean (SD)                       | 56.7 (20.7)      | 52.2 (23.8)   | 55.6 (23.4)    |
| <65, n (%)                      | 325,157 (57.7)   | 45,422 (63.0) | 382,322 (57.4) |
| 65-79, n (%)                    | 169,678 (30.1)   | 15,918 (22.1) | 167,007 (25.1) |
| 80+, n (%)                      | 68,436 (12.2)    | 10,803 (15.0) | 116,426 (17.5) |
| <b>Sex, n (%)</b>               |                  |               |                |
| Males                           | 259,002 (46.0)   | 27,484 (38.1) | 270,243 (40.6) |
| Females                         | 304,269 (54.0)   | 44,659 (61.9) | 395,512 (59.4) |
| <b>Income quintile, n (%)</b>   |                  |               |                |
| 1st (Lowest)                    | 74,570 (13.2)    | 19,335 (26.8) | 152,780 (22.9) |
| 2nd                             | 43,965 (7.8)     | 15,169 (21.0) | 137,980 (20.7) |
| 3rd                             | 40,479 (7.2)     | 13,916 (19.3) | 131,971 (19.8) |
| 4th                             | 45,859 (8.1)     | 12,295 (17.0) | 123,421 (18.5) |
| 5th (Highest)                   | 126,662 (22.5)   | 10,244 (14.2) | 116,783 (17.5) |
| Missing                         | 231,736 (41.1)   | 1,184 (1.6)   | 2,820 (0.4)    |
| <b>Area of residence, n (%)</b> |                  |               |                |

1  
2  
3  
4  
5  
6  
7  
8  
9  
10  
11  
12  
13  
14  
15  
16  
17  
18  
19  
20  
21  
22  
23  
24  
25  
26  
27  
28  
29  
30  
31  
32  
33  
34  
35  
36  
37  
38  
39  
40  
41  
42  
43  
44  
45  
46  
47  
48  
49  
50  
51  
52  
53  
54  
55  
56  
57  
58  
59  
60

|         |                |               |                |
|---------|----------------|---------------|----------------|
| Rural   | 71,057 (12.6)  | 31,228 (43.3) | 82,452 (12.4)  |
| Urban   | 492,214 (87.4) | 40,903 (56.7) | 580,772 (87.2) |
| Missing | 0 (0.0)        | 12 (0.0)      | 2,531 (0.4)    |

---

**Abbreviation:** SD: standard deviation

Confidential



**Table S2. Characteristics of emergency department (ED) cohort by province**

| Characteristic                  | British Columbia | Manitoba       | Ontario          |
|---------------------------------|------------------|----------------|------------------|
| <b>Patients, N</b>              | 534,607          | 166,158        | 2,472,119        |
| <b>Age, years</b>               |                  |                |                  |
| Mean (SD)                       | 44.0 (23.5)      | 42.0 (24.2)    | 43.3 (23.5)      |
| <65, n (%)                      | 416,553 (77.92)  | 131,468 (79.1) | 1,948,851 (78.8) |
| 65-79, n (%)                    | 79,409 (14.9)    | 23,208 (14.0)  | 361,389 (14.6)   |
| 80+, n (%)                      | 38,645 (7.2)     | 11,482 (6.9)   | 161,879 (6.5)    |
| <b>Sex, n (%)</b>               |                  |                |                  |
| Males                           | 260,531 (48.7)   | 78,692 (47.4)  | 1,181,949 (47.8) |
| Females                         | 274,076 (51.3)   | 87,466 (52.6)  | 1,290,170 (52.2) |
| <b>Income quintile, n (%)</b>   |                  |                |                  |
| 1st (Lowest)                    | 56,441 (10.6)    | 41,294 (24.9)  | 541,669 (21.9)   |
| 2nd                             | 28,257 (5.3)     | 32,655 (19.7)  | 498,663 (20.2)   |
| 3rd                             | 26,088 (4.9)     | 28,540 (17.2)  | 494,497 (20.0)   |
| 4th                             | 30,000 (5.6)     | 31,424 (18.9)  | 478,641 (19.4)   |
| 5th (Highest)                   | 91,536 (17.1)    | 30,296 (18.2)  | 448,355 (18.1)   |
| Missing                         | 302,285 (56.5)   | 1,949 (1.2)    | 10,294 (0.4)     |
| <b>Area of residence, n (%)</b> |                  |                |                  |
| Rural                           | 15,314 (2.9)     | 61,009 (36.7)  | 366,131 (14.8)   |

1  
2  
3  
4  
5  
6  
7  
8  
9  
10  
11  
12  
13  
14  
15  
16  
17  
18  
19  
20  
21  
22  
23  
24  
25  
26  
27  
28  
29  
30  
31  
32  
33  
34  
35  
36  
37  
38  
39  
40  
41  
42  
43  
44  
45  
46  
47  
48  
49  
50  
51  
52  
53  
54  
55  
56  
57  
58  
59  
60

|                      |                |                 |                  |
|----------------------|----------------|-----------------|------------------|
| Urban                | 519,293 (97.2) | 105,130 (63.3)  | 2,097,009 (84.8) |
| Missing              | 0 (0.0)        | 19 (0.0)        | 8,979 (0.4)      |
| <b>Abbreviation:</b> | <b>SD:</b>     | <b>standard</b> | <b>deviation</b> |

Confidential

**Table S3. Characteristics of outpatient cohort by province**

| Characteristic                  | British Columbia | Manitoba       | Ontario          |
|---------------------------------|------------------|----------------|------------------|
| <b>Patients, N</b>              | 3,957,380        | 995,070        | 10,186,924       |
| <b>Age, years</b>               |                  |                |                  |
| Mean (SD)                       | 45.6 (22.9)      | 42.4 (23.7)    | 44.2 (23.4)      |
| <65, n (%)                      | 3,013,785 (76.2) | 791,630 (79.6) | 7,947,374 (78.0) |
| 65-79, n (%)                    | 701,382 (17.7)   | 151,703 (15.2) | 1,653,837 (16.2) |
| 80+, n (%)                      | 242,213 (6.1)    | 51,737 (5.2)   | 585,713 (5.7)    |
| <b>Sex, n (%)</b>               |                  |                |                  |
| Males                           | 1,838,783 (46.5) | 457,319 (46.0) | 4,630,592 (45.5) |
| Females                         | 2,118,597 (53.5) | 537,751 (54.0) | 5,556,332 (54.5) |
| <b>Income quintile, n (%)</b>   |                  |                |                  |
| 1st (Lowest)                    | 354,954 (9.0)    | 186,810 (18.8) | 1,921,604 (18.9) |
| 2nd                             | 201,328 (5.1)    | 194,547 (19.5) | 1,974,778 (19.4) |
| 3rd                             | 194,709 (4.9)    | 203,330 (20.4) | 2,062,403 (20.2) |
| 4th                             | 231,708 (5.9)    | 197,987 (19.9) | 2,093,465 (20.6) |
| 5th (Highest)                   | 745,651 (18.8)   | 203,409 (20.4) | 2,094,745 (20.6) |
| Missing                         | 2,229,030 (56.3) | 8,987 (0.9)    | 39,929 (0.4)     |
| <b>Area of residence, n (%)</b> |                  |                |                  |
| Rural                           | 412,296 (10.4)   | 348,274 (35.0) | 929,450 (9.1)    |
| Urban                           | 3,545,084 (89.6) | 646,683 (65.0) | 9,221,005 (90.5) |

1  
2  
3  
4  
5  
6  
7  
8  
9  
10  
11  
12  
13  
14  
15  
16  
17  
18  
19  
20  
21  
22  
23  
24  
25  
26  
27  
28  
29  
30  
31  
32  
33  
34  
35  
36  
37  
38  
39  
40  
41  
42  
43  
44  
45  
46  
47  
48  
49  
50  
51  
52  
53  
54  
55  
56  
57  
58  
59  
60

|         |         |           |              |
|---------|---------|-----------|--------------|
| Missing | 0 (0.0) | 113 (0.0) | 36,469 (0.4) |
|---------|---------|-----------|--------------|

---

**Abbreviation:** SD: standard deviation

Confidential

**Table S4. COVID-19 diagnosed cases by province and quarter (Q): inpatient cohort**

|                         | <b>Q1</b>                    | <b>Q2</b>                     | <b>Q3</b>                    | <b>Q4</b>                    |
|-------------------------|------------------------------|-------------------------------|------------------------------|------------------------------|
| <b>Case Type</b>        | <b>(Apr 2020 – Jun 2020)</b> | <b>(Jul 2020 – Sept 2020)</b> | <b>(Oct 2020 – Dec 2020)</b> | <b>(Jan 2021 – Mar 2021)</b> |
| <b>British Columbia</b> |                              |                               |                              |                              |
| True Positive           | 260                          | 134                           | 952                          | 1,400                        |
| False Positive          | 607                          | 618                           | 1,076                        | 975                          |
| False Negative          | 34                           | 105                           | 880                          | 1,216                        |
| True Negative           | 23,447                       | 25,737                        | 42,290                       | 57,899                       |
| <b>Total</b>            | <b>24,348</b>                | <b>26,594</b>                 | <b>45,198</b>                | <b>61,490</b>                |
| <b>Manitoba</b>         |                              |                               |                              |                              |
| True Positive           | s                            | 86                            | 752                          | 280                          |
| False Positive          | 28                           | 56                            | 606                          | 242                          |
| False Negative          | s                            | 28                            | 520                          | 301                          |
| True Negative           | 6,251                        | 7,841                         | 12,172                       | 15,767                       |
| <b>Total</b>            | <b>6,306</b>                 | <b>8,011</b>                  | <b>14,050</b>                | <b>16,590</b>                |
| <b>Ontario</b>          |                              |                               |                              |                              |
| True Positive           | 2,862                        | 707                           | 3,170                        | 6,350                        |
| False Positive          | 954                          | 253                           | 1,475                        | 2,869                        |
| False Negative          | 468                          | 261                           | 1,920                        | 2,592                        |
| True Negative           | 81,835                       | 113,828                       | 122,061                      | 140,211                      |
| <b>Total</b>            | <b>86,119</b>                | <b>115,049</b>                | <b>128,626</b>               | <b>152,022</b>               |

Abbreviation: s = suppressed cell for values under 6

**Table S5. COVID-19 diagnosed cases by province and quarter (Q): emergency department (ED) cohort**

|                         | Q1                       | Q2                        | Q3                       | Q4                       |
|-------------------------|--------------------------|---------------------------|--------------------------|--------------------------|
| Case Type               | (Apr 2020 –<br>Jun 2020) | (Jul 2020 –<br>Sept 2020) | (Oct 2020 –<br>Dec 2020) | (Jan 2021 –<br>Mar 2021) |
| <b>British Columbia</b> |                          |                           |                          |                          |
| True Positive           | 140                      | 336                       | 1,207                    | 1,024                    |
| False Positive          | 37                       | 84                        | 759                      | 740                      |
| False Negative          | 127                      | 422                       | 2,593                    | 2,544                    |
| True Negative           | 20,068                   | 28,937                    | 40,888                   | 38,628                   |
| <b>Total</b>            | <b>20,372</b>            | <b>29,779</b>             | <b>45,447</b>            | <b>42,936</b>            |
| <b>Manitoba</b>         |                          |                           |                          |                          |
| True Positive           | 0                        | s                         | 223                      | 109                      |
| False Positive          | 9                        | s                         | 428                      | 164                      |
| False Negative          | 18                       | 148                       | 2,032                    | 833                      |
| True Negative           | 9,539                    | 12,920                    | 15,371                   | 14,451                   |
| <b>Total</b>            | <b>9,566</b>             | <b>13,100</b>             | <b>18,054</b>            | <b>15,557</b>            |
| <b>Ontario</b>          |                          |                           |                          |                          |
| True Positive           | 3,653                    | 1,645                     | 11,710                   | 11,073                   |
| False Positive          | 1,094                    | 423                       | 2,688                    | 4,755                    |
| False Negative          | 2,338                    | 1,499                     | 8,118                    | 10,104                   |
| True Negative           | 168,109                  | 264,129                   | 233,122                  | 223,935                  |
| <b>Total</b>            | <b>175,194</b>           | <b>267,696</b>            | <b>255,638</b>           | <b>249,867</b>           |

Abbreviation: s = suppressed cell for values under 6

Table S6. COVID-19 diagnosed cases by province and quarter (Q): outpatient cohort

|                         | Q1                       | Q2                        | Q3                       | Q4                       |
|-------------------------|--------------------------|---------------------------|--------------------------|--------------------------|
| Case Type               | (Apr 2020 –<br>Jun 2020) | (Jul 2020 –<br>Sept 2020) | (Oct 2020 –<br>Dec 2020) | (Jan 2021 –<br>Mar 2021) |
| <b>British Columbia</b> |                          |                           |                          |                          |
| True Positive           | 145                      | 311                       | 854                      | 996                      |
| False Positive          | 13,937                   | 20,101                    | 14,453                   | 6,724                    |
| False Negative          | 1,274                    | 4,826                     | 35,541                   | 39,252                   |
| True Negative           | 107,086                  | 221,715                   | 448,235                  | 373,009                  |
| <b>Total</b>            | 122,442                  | 246,953                   | 499,083                  | 419,981                  |
| <b>Manitoba</b>         |                          |                           |                          |                          |
| True Positive           | s                        | 15                        | 526                      | 203                      |
| False Positive          | 169                      | 165                       | 3,237                    | 3,332                    |
| False Negative          | s                        | 877                       | 10,108                   | 3,002                    |
| True Negative           | 31,038                   | 64,504                    | 93,690                   | 65,535                   |
| <b>Total</b>            | 31,286                   | 65,561                    | 107,561                  | 72,072                   |
| <b>Ontario</b>          |                          |                           |                          |                          |
| True Positive           | 4,095                    | 1,955                     | 26,096                   | 32,389                   |
| False Positive          | 44,223                   | 59,352                    | 90,070                   | 71,676                   |
| False Negative          | 15,278                   | 7,794                     | 52,999                   | 58,681                   |
| True Negative           | 542,811                  | 886,211                   | 1,040,493                | 1,027,919                |
| <b>Total</b>            | 606,407                  | 955,312                   | 1,209,658                | 1,190,665                |

Abbreviation: s = suppressed cell for values under 6

**Table S7. Overall validation estimates (95% confidence intervals) by age group, sex, and quarter (Q): inpatient cohort**

|                                  | Sensitivity       | Specificity       | PPV               | NPV               |
|----------------------------------|-------------------|-------------------|-------------------|-------------------|
| <b>Q1 (Apr 2020 – Jun 2020)</b>  |                   |                   |                   |                   |
| <b>Age Group</b>                 |                   |                   |                   |                   |
| <65                              | 83.9 (80.5, 87.3) | 98.6 (98.4, 98.7) | 60.1 (57.0, 63.2) | 99.6 (99.5, 99.7) |
| 65-79                            | 89.2 (86.1, 92.4) | 98.7 (98.4, 98.9) | 69.0 (65.5, 72.5) | 99.6 (99.5, 99.7) |
| 80+                              | 86.0 (82.6, 89.4) | 98.6 (98.3, 98.8) | 72.2 (68.7, 75.7) | 99.4 (99.3, 99.5) |
| <b>Sex</b>                       |                   |                   |                   |                   |
| Male                             | 88.2 (85.7, 90.7) | 98.4 (98.2, 98.6) | 65.5 (62.8, 68.1) | 99.6 (99.5, 99.7) |
| Female                           | 83.8 (80.8, 86.8) | 98.8 (98.6, 98.9) | 67.6 (64.7, 70.5) | 99.5 (99.4, 99.6) |
| <b>Q2 (Jul 2020 – Sept 2020)</b> |                   |                   |                   |                   |
| <b>Age Group</b>                 |                   |                   |                   |                   |
| <65                              | 60.9 (54.1, 67.7) | 99.4 (99.3, 99.5) | 46.7 (41.7, 51.8) | 99.7 (99.6, 99.7) |
| 65-79                            | 76.4 (68.8, 84.0) | 99.3 (99.2, 99.5) | 48.5 (43.0, 54.0) | 99.8 (99.7, 99.9) |
| 80+                              | 79.1 (71.9, 86.3) | 99.3 (99.2, 99.5) | 56.5 (50.5, 62.5) | 99.8 (99.7, 99.8) |
| <b>Sex</b>                       |                   |                   |                   |                   |
| Male                             | 77.6 (72.1, 83.1) | 99.2 (99.1, 99.4) | 49.5 (45.4, 53.6) | 99.8 (99.7, 99.8) |
| Female                           | 62.7 (56.2, 69.1) | 99.5 (99.4, 99.6) | 50.6 (45.7, 55.6) | 99.7 (99.6, 99.7) |
| <b>Q3 (Oct 2020 – Dec 2020)</b>  |                   |                   |                   |                   |
| <b>Age Group</b>                 |                   |                   |                   |                   |
| <65                              | 46.0 (43.2, 48.8) | 98.3 (98.2, 98.5) | 52.1 (49.5, 54.7) | 97.8 (97.7, 98.0) |
| 65-79                            | 70.2 (66.9, 73.4) | 98.2 (98.0, 98.4) | 63.4 (60.6, 66.2) | 98.6 (98.5, 98.8) |
| 80+                              | 70.7 (67.5, 74.0) | 98.2 (97.9, 98.4) | 70.1 (67.2, 73.0) | 98.2 (98.0, 98.4) |
| <b>Sex</b>                       |                   |                   |                   |                   |
| Male                             | 66.5 (64.0, 69.0) | 97.9 (97.7, 98.1) | 60.4 (58.3, 62.5) | 98.4 (98.3, 98.5) |



1 Female 52.6 (50.0, 55.3) 98.6 (98.4, 98.7) 61.1 (58.6, 63.5) 98.0 (97.9, 98.1)

2  
3 **Q4 (Jan 2021 – Mar 2021)**

4 **Age Group**

5  
6 <65 50.6 (48.3, 52.9) 98.2 (98.1, 98.3) 56.7 (54.5, 58.8) 97.7 (97.6, 97.8)

7  
8 65-79 76.9 (74.5, 79.3) 98.1 (97.9, 98.3) 69.9 (67.7, 72.1) 98.7 (98.5, 98.8)

9  
10 80+ 80.4 (78.0, 82.7) 97.9 (97.7, 98.2) 75.6 (73.4, 77.9) 98.4 (98.2, 98.6)

11  
12 **Sex**

13  
14 Male 72.4 (70.5, 74.4) 97.8 (97.6, 97.9) 66.6 (64.9, 68.3) 98.3 (98.2, 98.4)

15  
16 Female 59.8 (57.7, 62.0) 98.4 (98.3, 98.6) 65.9 (64.0, 67.8) 98.0 (97.9, 98.1)

17  
18  
19 **Abbreviations:** PPV: Positive predictive value; NPV: Negative predictive value

20  
21  
22  
23  
24  
25  
26  
27  
28  
29  
30  
31  
32  
33  
34  
35  
36  
37  
38  
39  
40  
41  
42  
43  
44  
45  
46  
47  
48  
49  
50  
51  
52  
53  
54  
55  
56  
57  
58  
59  
60

Confidential

**Table S8. Overall validation estimates (95% confidence intervals) by age group, sex, and quarter (Q): emergency department (ED) cohort**

|                                  | Sensitivity       | Specificity       | PPV               | NPV               |
|----------------------------------|-------------------|-------------------|-------------------|-------------------|
| <b>Q1 (Apr 2020 – Jun 2020)</b>  |                   |                   |                   |                   |
| <b>Age Group</b>                 |                   |                   |                   |                   |
| <65                              | 63.5 (61.2, 65.8) | 99.4 (99.3, 99.5) | 78.0 (76.0, 80.0) | 98.8 (98.7, 98.8) |
| 65-79                            | 55.7 (49.5, 61.8) | 99.6 (99.5, 99.7) | 76.7 (70.9, 82.4) | 99.0 (98.9, 99.1) |
| 80+                              | 35.7 (28.3, 43.1) | 99.4 (99.2, 99.6) | 60.4 (51.3, 69.4) | 98.3 (98.2, 98.5) |
| <b>Sex</b>                       |                   |                   |                   |                   |
| Male                             | 63.9 (60.9, 66.9) | 99.5 (99.4, 99.6) | 80.3 (77.7, 82.9) | 98.8 (98.7, 98.9) |
| Female                           | 57.4 (54.5, 60.3) | 99.4 (99.3, 99.5) | 74.0 (71.3, 76.6) | 98.7 (98.6, 98.8) |
| <b>Q2 (Jul 2020 – Sept 2020)</b> |                   |                   |                   |                   |
| <b>Age Group</b>                 |                   |                   |                   |                   |
| <65                              | 49.3 (46.5, 52.2) | 99.8 (99.8, 99.8) | 78.9 (76.1, 81.7) | 99.3 (99.2, 99.3) |
| 65-79                            | 50.4 (41.5, 59.4) | 99.9 (99.8, 99.9) | 78.4 (69.7, 87.0) | 99.6 (99.5, 99.6) |
| 80+                              | 36.9 (23.5, 50.3) | 99.9 (99.8, 100)  | 73.3 (56.9, 89.8) | 99.5 (99.5, 99.6) |
| <b>Sex</b>                       |                   |                   |                   |                   |
| Male                             | 49.4 (45.6, 53.1) | 99.8 (99.8, 99.9) | 80.0 (76.4, 83.7) | 99.3 (99.2, 99.3) |
| Female                           | 48.6 (44.9, 52.4) | 99.8 (99.8, 99.9) | 77.5 (73.8, 81.3) | 99.4 (99.3, 99.4) |
| <b>Q3 (Oct 2020 – Dec 2020)</b>  |                   |                   |                   |                   |
| <b>Age Group</b>                 |                   |                   |                   |                   |
| <65                              | 52.5 (51.3, 53.7) | 98.6 (98.6, 98.7) | 77.9 (76.8, 79.0) | 95.8 (95.7, 95.9) |
| 65-79                            | 48.2 (45.0, 51.3) | 98.8 (98.6, 99.0) | 75.5 (72.4, 78.6) | 96.1 (95.9, 96.3) |
| 80+                              | 31.3 (27.2, 35.4) | 99.0 (98.8, 99.2) | 68.4 (62.7, 74.0) | 95.4 (95.1, 95.6) |
| <b>Sex</b>                       |                   |                   |                   |                   |
| Male                             | 53.8 (52.3, 55.3) | 98.6 (98.5, 98.7) | 79.3 (78.0, 80.7) | 95.6 (95.5, 95.8) |

1 Female 47.9 (46.4, 49.4) 98.7 (98.6, 98.8) 75.1 (73.6, 76.6) 95.9 (95.8, 96.0)

2  
3 **Q4 (Jan 2021 – Mar 2021)**

4 **Age Group**

5  
6 <65 47.8 (46.7, 49.0) 97.8 (97.7, 97.9) 68.1 (66.9, 69.3) 95.1 (95.0, 95.2)

7  
8 65-79 50.1 (47.0, 53.1) 98.4 (98.2, 98.6) 69.9 (66.8, 72.9) 96.3 (96.1, 96.5)

9  
10 80+ 37.1 (32.7, 41.5) 99.0 (98.8, 99.2) 68.8 (63.4, 74.1) 96.3 (96.1, 96.6)

11  
12 **Sex**

13  
14 Male 48.4 (46.8, 49.9) 97.9 (97.8, 98.0) 69.9 (68.3, 71.4) 94.9 (94.8, 95.1)

15  
16 Female 46.7 (45.2, 48.2) 98.1 (98.0, 98.2) 66.9 (65.3, 68.4) 95.7 (95.6, 95.8)

17  
18  
19 **Abbreviations:** PPV: Positive predictive value; NPV: Negative predictive value

20  
21  
22  
23  
24  
25  
26  
27  
28  
29  
30  
31  
32  
33  
34  
35  
36  
37  
38  
39  
40  
41  
42  
43  
44  
45  
46  
47  
48  
49  
50  
51  
52  
53  
54  
55  
56  
57  
58  
59  
60

Confidential

**Table S9. Overall validation estimates (95% confidence intervals) by age group, sex, and quarter (Q): outpatient cohort**

|                                  | Sensitivity       | Specificity       | PPV               | NPV               |
|----------------------------------|-------------------|-------------------|-------------------|-------------------|
| <b>Q1 (Apr 2020 – Jun 2020)</b>  |                   |                   |                   |                   |
| <b>Age Group</b>                 |                   |                   |                   |                   |
| <65                              | 26.0 (24.7, 27.3) | 90.6 (90.4, 90.7) | 7.0 (6.6, 7.3)    | 97.8 (97.8, 97.9) |
| 65-79                            | 13.0 (10.9, 15.1) | 94.1 (93.9, 94.3) | 4.3 (3.7, 5.0)    | 98.1 (98.1, 98.2) |
| 80+                              | 8.7 (7.3, 10.1)   | 96.4 (96.2, 96.6) | 9.4 (8.0, 10.9)   | 96.1 (96.1, 96.2) |
| <b>Sex</b>                       |                   |                   |                   |                   |
| Male                             | 20.6 (19.2, 22.1) | 91.6 (91.4, 91.8) | 6.9 (6.4, 7.4)    | 97.5 (97.4, 97.5) |
| Female                           | 20.1 (18.9, 21.3) | 92.4 (92.3, 92.6) | 6.7 (6.3, 7.1)    | 97.7 (97.7, 97.8) |
| <b>Q2 (Jul 2020 – Sept 2020)</b> |                   |                   |                   |                   |
| <b>Age Group</b>                 |                   |                   |                   |                   |
| <65                              | 15.3 (14.3, 16.4) | 92.9 (92.8, 93.0) | 2.9 (2.7, 3.1)    | 98.7 (98.7, 98.8) |
| 65-79                            | 21.1 (17.0, 25.1) | 96.6 (96.5, 96.8) | 3.9 (3.2, 4.6)    | 99.5 (99.4, 99.5) |
| 80+                              | 5.0 (2.2, 7.8)    | 97.4 (97.2, 97.6) | 1.5 (0.7, 2.4)    | 99.2 (99.2, 99.2) |
| <b>Sex</b>                       |                   |                   |                   |                   |
| Male                             | 14.6 (13.2, 16.0) | 93.2 (93.1, 93.3) | 3.1 (2.8, 3.4)    | 98.7 (98.7, 98.7) |
| Female                           | 14.3 (13.0, 15.6) | 93.9 (93.8, 94.0) | 2.6 (2.3, 2.8)    | 99.0 (99.0, 99.0) |
| <b>Q3 (Oct 2020 – Dec 2020)</b>  |                   |                   |                   |                   |
| <b>Age Group</b>                 |                   |                   |                   |                   |
| <65                              | 23.5 (23.0, 23.9) | 93.1 (93.0, 93.1) | 20.5 (20.1, 20.8) | 94.1 (94.1, 94.1) |
| 65-79                            | 26.5 (25.1, 27.9) | 95.8 (95.7, 96.0) | 25.9 (24.7, 27.1) | 95.9 (95.9, 96.0) |
| 80+                              | 9.5 (8.4, 10.6)   | 96.9 (96.7, 97.1) | 19.3 (17.3, 21.2) | 93.2 (93.1, 93.3) |
| <b>Sex</b>                       |                   |                   |                   |                   |
| Male                             | 23.0 (22.4, 23.5) | 92.9 (92.8, 93.0) | 21.7 (21.2, 22.2) | 93.4 (93.3, 93.4) |

|        |                   |                   |                   |                   |
|--------|-------------------|-------------------|-------------------|-------------------|
| Female | 20.8 (20.2, 21.3) | 94.1 (94.0, 94.2) | 19.1 (18.7, 19.6) | 94.6 (94.6, 94.7) |
|--------|-------------------|-------------------|-------------------|-------------------|

---

**Q4 (Jan 2021 – Mar 2021)**

**Age Group**

|       |                   |                   |                   |                   |
|-------|-------------------|-------------------|-------------------|-------------------|
| <65   | 25.9 (25.5, 26.4) | 94.8 (94.7, 94.8) | 31.9 (31.4, 32.3) | 93.1 (93.1, 93.2) |
| 65-79 | 33.9 (32.4, 35.3) | 95.0 (94.9, 95.2) | 26.7 (25.6, 27.7) | 96.4 (96.3, 96.5) |
| 80+   | 14.9 (13.4, 16.4) | 94.3 (94.0, 94.5) | 12.9 (11.7, 14.1) | 95.1 (95.0, 95.2) |

**Sex**

|        |                   |                   |                   |                   |
|--------|-------------------|-------------------|-------------------|-------------------|
| Male   | 25.6 (25.0, 26.2) | 94.4 (94.3, 94.5) | 31.5 (30.9, 32.1) | 92.6 (92.5, 92.7) |
| Female | 24.4 (23.9, 25.0) | 95.0 (94.9, 95.1) | 27.2 (26.7, 27.7) | 94.2 (94.2, 94.3) |

---

**Abbreviations:** PPV: Positive predictive value; NPV: Negative predictive value

Confidential

**Table S10. Sensitivity analyses of validation estimates (95% confidence intervals) for the inpatient cohort: positive test no more than 7 days before hospital admission date or before discharge date**

|                         | Q1                    | Q2                     | Q3                    | Q4                    |
|-------------------------|-----------------------|------------------------|-----------------------|-----------------------|
| Measure                 | (Apr 2020 – Jun 2020) | (Jul 2020 – Sept 2020) | (Oct 2020 – Dec 2020) | (Jan 2021 – Mar 2021) |
| <b>British Columbia</b> |                       |                        |                       |                       |
| <b>Sensitivity</b>      | 97.3 (95.5,99.2)      | 95.7 (92.9, 98.6)      | 98.0 (97.2, 98.7)     | 95.3 (94.4, 96.2)     |
| <b>Specificity</b>      | 97.1 (96.9, 97.4)     | 97.2 (97.0, 97.4)      | 97.9 (97.8, 98.1)     | 99.1 (99.1, 99.2)     |
| <b>PPV</b>              | 33.3 (30.2, 36.5)     | 23.9 (20.9, 27.0)      | 67.1 (65.0, 69.1)     | 81.0 (79.4, 82.6)     |
| <b>NPV</b>              | 99.9 (99.9, 100.0)    | 100.0 (99.9, 100.0)    | 99.9 (99.9, 99.9)     | 99.8 (99.8, 99.9)     |
| <b>Manitoba</b>         |                       |                        |                       |                       |
| <b>Sensitivity</b>      | 90.3 (79.9, 100)      | 80.4 (73.9, 86.9)      | 69.7 (67.5, 71.9)     | 60.2 (56.7, 63.7)     |
| <b>Specificity</b>      | 99.6 (99.5, 99.8)     | 99.7 (99.5, 99.8)      | 98.7 (98.5, 98.9)     | 99.6 (99.5, 99.7)     |
| <b>PPV</b>              | 53.9 (40.3, 67.4)     | 81.0 (74.5, 87.4)      | 88.0 (86.3, 89.7)     | 87.2 (84.3, 90.0)     |
| <b>NPV</b>              | 99.9 (99.9, 100)      | 99.6 (99.5, 99.8)      | 95.9 (95.6, 96.2)     | 98.1 (97.9, 98.3)     |
| <b>Ontario</b>          |                       |                        |                       |                       |
| <b>Sensitivity</b>      | 88.3 (87.3, 89.3)     | 76.7 (74.2, 79.2)      | 68.7 (67.5, 69.8)     | 76.2 (75.5, 77.0)     |
| <b>Specificity</b>      | 99.6 (99.6, 99.7)     | 99.9 (99.9, 99.9)      | 99.6 (99.6, 99.7)     | 99.4 (99.3, 99.4)     |
| <b>PPV</b>              | 92.5 (91.7, 93.4)     | 89.6 (87.7, 91.5)      | 90.6 (89.8, 91.5)     | 90.2 (89.6, 90.8)     |
| <b>NPV</b>              | 99.4 (99.4, 99.5)     | 99.8 (99.7, 99.8)      | 98.5 (98.4, 98.5)     | 98.2 (98.1, 98.3)     |
| <b>All</b>              |                       |                        |                       |                       |
| <b>Sensitivity</b>      | 88.9 (87.3, 90.5)     | 79.6 (76.0, 83.1)      | 73.3 (71.7, 74.8)     | 78.2 (77.0, 79.4)     |
| <b>Specificity</b>      | 99.2 (99.1, 99.3)     | 99.5 (99.5, 99.6)      | 99.2 (99.2, 99.3)     | 99.3 (99.3, 99.4)     |
| <b>PPV</b>              | 81.3 (79.5, 83.0)     | 62.3 (59.1, 65.5)      | 84.2 (82.9, 85.5)     | 88.3 (87.4, 89.2)     |
| <b>NPV</b>              | 99.6 (99.5, 99.6)     | 99.8 (99.8, 99.8)      | 98.5 (98.5, 98.6)     | 98.6 (98.5, 98.7)     |

**Abbreviations:** Q: quarter; PV: Positive predictive value; NPV: Negative predictive value

**Table S11. Sensitivity analyses of validation estimates (95% confidence intervals) for the inpatient cohort: positive test no more than 14 days before admission date or 14 days after admission date**

|                         | Q1                    | Q2                     | Q3                    | Q4                    |
|-------------------------|-----------------------|------------------------|-----------------------|-----------------------|
| Measure                 | (Apr 2020 – Jun 2020) | (Jul 2020 – Sept 2020) | (Oct 2020 – Dec 2020) | (Jan 2021 – Mar 2021) |
| <b>British Columbia</b> |                       |                        |                       |                       |
| <b>Sensitivity</b>      | 90.1 (86.9, 93.2)     | 65.2 (59.9, 70.6)      | 64.0 (62.1, 65.9)     | 63.8 (62.2, 65.4)     |
| <b>Specificity</b>      | 97.7 (97.5, 97.9)     | 97.9 (97.7, 98.1)      | 98.9 (98.8, 99.0)     | 99.6 (99.6, 99.7)     |
| <b>PPV</b>              | 35.5 (32.3, 38.7)     | 26.2 (23.1, 29.3)      | 77.2 (75.4, 79.0)     | 90.3 (89.1, 91.5)     |
| <b>NPV</b>              | 99.9 (99.8, 99.9)     | 99.6 (99.5, 99.7)      | 98.0 (97.8, 98.1)     | 97.9 (97.8, 98.1)     |
| <b>Manitoba</b>         |                       |                        |                       |                       |
| <b>Sensitivity</b>      | 83.3 (66.1, 100)      | 71.1(62.1, 80.2)       | 69.0 (66.8, 71.2)     | 60.3 (56.9, 63.8)     |
| <b>Specificity</b>      | 99.4 (99.2, 99.6)     | 99.1 (98.9, 99.3)      | 98.4 (98.2, 98.6)     | 99.6 (99.5, 99.7)     |
| <b>PPV</b>              | 28.9 (16.5, 41.2)     | 48.6 (40.4, 56.8)      | 85.4 (83.5, 87.2)     | 87.7 (84.9, 90.5)     |
| <b>NPV</b>              | 100.0 (99.9, 100)     | 99.6 (99.5, 99.8)      | 95.9 (95.6, 96.2)     | 98.1 (97.9, 98.3)     |
| <b>Ontario</b>          |                       |                        |                       |                       |
| <b>Sensitivity</b>      | 88.5 (87.5, 89.4)     | 76.4 (73.9, 78.9)      | 69.4 (68.3, 70.5)     | 76.5 (75.8, 77.3)     |
| <b>Specificity</b>      | 99.7 (99.7, 99.8)     | 99.9 (99.9, 99.9)      | 99.8 (99.7, 99.8)     | 99.5 (99.4, 99.5)     |
| <b>PPV</b>              | 94.0 (93.2, 94.7)     | 87.8 (85.7, 89.9)      | 93.7 (93.0, 94.4)     | 91.8 (91.2, 92.3)     |
| <b>NPV</b>              | 99.4 (99.4, 99.5)     | 99.8 (99.7, 99.8)      | 98.5 (98.4, 98.5)     | 98.2 (98.1, 98.3)     |
| <b>All</b>              |                       |                        |                       |                       |
| <b>Sensitivity</b>      | 88.6 (86.9, 90.2)     | 73.8 (69.9, 77.6)      | 68.1 (66.5, 69.6)     | 72.9 (71.7, 74.1)     |
| <b>Specificity</b>      | 99.3 (99.2, 99.4)     | 99.5 (99.4, 99.6)      | 99.5 (99.4, 99.5)     | 99.5 (99.5, 99.6)     |
| <b>PPV</b>              | 82.6 (80.8, 84.3)     | 59.8 (56.6, 63.1)      | 88.1 (87.0, 89.3)     | 91.3 (90.5, 92.1)     |
| <b>NPV</b>              | 99.6 (99.5, 99.6)     | 99.7 (99.7, 99.8)      | 98.2 (98.1, 98.2)     | 98.1 (98.0, 98.2)     |

**Abbreviations:** Q: quarter; PV: Positive predictive value; NPV: Negative predictive value

**Table S12. Sensitivity analyses of validation estimates (95% confidence intervals) for the emergency department (ED) cohort: 5 days before or after specimen collection date**

|                         | Q1                    | Q2                     | Q3                    | Q4                    |
|-------------------------|-----------------------|------------------------|-----------------------|-----------------------|
| Measure                 | (Apr 2020 – Jun 2020) | (Jul 2020 – Sept 2020) | (Oct 2020 – Dec 2020) | (Jan 2021 – Mar 2021) |
| <b>British Columbia</b> |                       |                        |                       |                       |
| <b>Sensitivity</b>      | 54.5 (48.6, 60.3)     | 46.1 (42.6, 49.6)      | 36.3 (34.8, 37.8)     | 33.1 (31.6, 34.6)     |
| <b>Specificity</b>      | 99.9 (99.8, 99.9)     | 99.8 (99.7, 99.8)      | 98.8 (98.7, 98.9)     | 98.7 (98.6, 98.8)     |
| <b>PPV</b>              | 85.9 (80.7, 91.0)     | 86.0 (82.6, 89.3)      | 75.1 (73.2, 77.0)     | 71.4 (69.3, 73.5)     |
| <b>NPV</b>              | 99.4 (99.3, 99.5)     | 98.6 (98.4, 98.7)      | 94.0 (93.8, 94.3)     | 93.8 (93.6, 94.1)     |
| <b>Manitoba</b>         |                       |                        |                       |                       |
| <b>Sensitivity</b>      | 10.0 (0.0, 23.1)      | 8.1 (3.9, 12.3)        | 15.5 (14.1, 17.0)     | 16.3 (14.0, 18.6)     |
| <b>Specificity</b>      | 99.9 (99.9, 100.0)    | 99.9 (99.8, 99.9)      | 98.2 (98.0, 98.4)     | 99.2 (99.1, 99.4)     |
| <b>PPV</b>              | 22.2 (0.0, 49.4)      | 39.4 (22.7, 56.1)      | 57.3 (53.5, 61.1)     | 59.3 (53.5, 65.2)     |
| <b>NPV</b>              | 99.8 (99.7, 99.9)     | 98.9 (98.7, 99.0)      | 88.3 (87.8, 88.8)     | 94.6 (94.2, 94.9)     |
| <b>Ontario</b>          |                       |                        |                       |                       |
| <b>Sensitivity</b>      | 63.1 (61.9, 64.3)     | 54.4 (52.7, 56.1)      | 61.1 (60.4, 61.7)     | 55.7 (55.0, 56.3)     |
| <b>Specificity</b>      | 99.6 (99.5, 99.6)     | 99.9 (99.9, 99.9)      | 99.3 (99.3, 99.3)     | 98.6 (98.6, 98.7)     |
| <b>PPV</b>              | 84.2 (83.2, 85.3)     | 86.5 (85.0, 88.0)      | 88.4 (87.9, 88.9)     | 80.1 (79.5, 80.8)     |
| <b>NPV</b>              | 98.6 (98.6, 98.7)     | 99.4 (99.4, 99.5)      | 96.6 (96.6, 96.7)     | 95.7 (95.6, 95.8)     |
| <b>All</b>              |                       |                        |                       |                       |
| <b>Sensitivity</b>      | 62.6 (60.6, 64.6)     | 51.1 (48.5, 53.7)      | 53.4 (52.3, 54.4)     | 51.1 (50.1, 52.2)     |
| <b>Specificity</b>      | 99.6 (99.6, 99.7)     | 99.9 (99.9, 99.9)      | 99.2 (99.1, 99.2)     | 98.7 (98.6, 98.7)     |
| <b>PPV</b>              | 84.2 (82.5, 85.9)     | 85.8 (83.5, 88.1)      | 85.7 (84.8, 86.5)     | 79.0 (78.0, 79.9)     |
| <b>NPV</b>              | 98.8 (98.7, 98.8)     | 99.3 (99.3, 99.4)      | 95.8 (95.7, 95.9)     | 95.4 (95.3, 95.5)     |

**Abbreviations:** Q: quarter; PV: Positive predictive value; NPV: Negative predictive value



**Table S13. Sensitivity analyses of validation estimates (95% confidence intervals) for the outpatient cohort: 5 days before or after specimen collection date**

|                         | Q1                    | Q2                     | Q3                    | Q4                    |
|-------------------------|-----------------------|------------------------|-----------------------|-----------------------|
| Measure                 | (Apr 2020 – Jun 2020) | (Jul 2020 – Sept 2020) | (Oct 2020 – Dec 2020) | (Jan 2021 – Mar 2021) |
| <b>British Columbia</b> |                       |                        |                       |                       |
| <b>Sensitivity</b>      | 11.6 (9.9, 13.2)      | 6.6 (5.9, 7.2)         | 2.7 (2.5, 2.9)        | 2.7 (2.5, 2.9)        |
| <b>Specificity</b>      | 88.5 (88.3, 88.7)     | 91.7 (91.6, 91.8)      | 96.9 (96.9, 97.0)     | 98.3 (98.2, 98.3)     |
| <b>PPV</b>              | 1.2 (1.0, 1.4)        | 1.7 (1.5, 1.8)         | 6.4 (6.0, 6.8)        | 14.0 (13.3, 14.8)     |
| <b>NPV</b>              | 98.8 (98.8, 98.9)     | 97.9 (97.8, 97.9)      | 92.7 (92.6, 92.7)     | 90.5 (90.4, 90.6)     |
| <b>Manitoba</b>         |                       |                        |                       |                       |
| <b>Sensitivity</b>      | 3.8 (0.0, 8.0)        | 5.1 (3.7, 6.5)         | 9.3 (8.8, 9.8)        | 10.2 (9.2, 11.3)      |
| <b>Specificity</b>      | 99.5 (99.4, 99.5)     | 99.8 (99.8, 99.8)      | 97.2 (97.1, 97.3)     | 95.4 (95.2, 95.5)     |
| <b>PPV</b>              | 1.8 (0.0, 3.7)        | 26.1 (19.7, 32.5)      | 27.5 (26.1, 29.0)     | 9.7 (8.7, 10.6)       |
| <b>NPV</b>              | 99.8 (99.7, 99.8)     | 98.7 (98.6, 98.7)      | 90.3 (90.1, 90.4)     | 95.6 (95.5, 95.8)     |
| <b>Ontario</b>          |                       |                        |                       |                       |
| <b>Sensitivity</b>      | 30.0 (29.4, 30.6)     | 31.4 (30.5, 32.2)      | 41.3 (41.0, 41.6)     | 42.4 (42.1, 42.7)     |
| <b>Specificity</b>      | 92.9 (92.8, 92.9)     | 93.9 (93.8, 93.9)      | 93.0 (92.9, 93.0)     | 94.4 (94.4, 94.5)     |
| <b>PPV</b>              | 13.6 (13.3, 13.9)     | 5.8 (5.6, 6.0)         | 32.1 (31.8, 32.4)     | 41.5 (41.2, 41.8)     |
| <b>NPV</b>              | 97.3 (97.2, 97.3)     | 99.1 (99.1, 99.2)      | 95.2 (95.1, 95.2)     | 94.6 (94.6, 94.6)     |
| <b>All</b>              |                       |                        |                       |                       |
| <b>Sensitivity</b>      | 28.7 (27.2, 28.9)     | 30.4 (29.0, 31.8)      | 37.7 (37.2, 38.2)     | 41.1 (40.6, 41.6)     |
| <b>Specificity</b>      | 93.4 (93.3, 93.5)     | 94.4 (94.3, 94.5)      | 93.5 (93.4, 93.5)     | 94.6 (94.5, 94.7)     |
| <b>PPV</b>              | 11.6 (10.6, 12.5)     | 6.4 (6.1, 6.7)         | 32.6 (32.3, 33.0)     | 41.0 (40.5, 41.4)     |
| <b>NPV</b>              | 98.7 (94.7, 94.8)     | 99.1 (99.1, 99.1)      | 94.7 (94.7, 94.8)     | 94.6 (94.6, 94.7)     |

**Abbreviations:** Q: quarter; PV: Positive predictive value; NPV: Negative predictive value
